10/19/21

1 **Interaction of human Crx and Nrl in live cells measured using fluorescence**  
2 **resonance energy transfer (FRET)**

3  
4  
5

6 Xinming Zhuo<sup>1</sup> and Barry E. Knox

7

8 **Affiliations:**

9 Departments of Ophthalmology & Visual Sciences and Biochemistry & Molecular  
10 Biology, Center for Vision Research, SUNY Upstate Medical University, Syracuse, NY  
11 13210, USA

12 <sup>1</sup>Current address: CLIA Laboratory, The Jackson Laboratory for Genomic Medicine,  
13 University of Connecticut Health Center, 10 Discovery Dr., Farmington, CT 06032  
14 xmzhuo@gmail.com

15

16

17

18 Key words: cone-rod homeobox (Crx), neural retina leucine zipper (Nrl), fluorescence  
19 resonance energy transfer (FRET), flow cytometry, confocal microscopy, transcription  
20 factors, DNA binding protein, fluorescent proteins, gene expression, retina, rod  
21 photoreceptor

22

23

24 Please send correspondence to:

25 Barry E. Knox, Ph.D.

26 Department of Ophthalmology & Visual Sciences

27 Neuroscience Research Building, Room 3613

28 SUNY Upstate Medical University

29 505 Irving Avenue

30 Syracuse, NY, USA

31 Phone: 315-464-8719

32 knoxb@upstate.edu

33

## Crx and Nrl Interactions Using FRET

### 34 **Abstract**

35 Crx and Nrl are retina-specific transcription factors that control rod photoreceptor  
36 differentiation and synergistically activate rod phototransduction gene expression.  
37 Previous experiments showed they interact *in vitro* and in yeast two-hybrid assays. Here,  
38 we examined Crx-Nrl interaction in live HEK293T cells using two fluorescence resonance  
39 energy transfer (FRET) approaches: confocal microscopy and flow cytometry (FC-FRET).  
40 FC-FRET can provide measurements from many cells having wide donor-acceptor  
41 expression ranges. FRET efficiencies were calibrated with a series of donor (eGFP)-  
42 acceptor (mCherry) fusion proteins separated with linkers between 6-45 amino acids. Crx  
43 and Nrl were fused at either terminus with eGFP or mCherry to create fluorescent  
44 proteins, and all combinations were tested in transiently transfected cells. FRET signals  
45 between Crx or Nrl homo-pairs were highest with both fluorophores fused to the DNA  
46 binding domains (DBD), lower with both fused to the activation domains (AD), and not  
47 significant when fused on opposite termini. Nrl had stronger FRET signals than Crx. A  
48 significant FRET signal between Crx and Nrl hetero-pairs was detected when donor was  
49 fused to the Crx DNA binding domain and the acceptor fused to the Nrl activation domain.  
50 FRET signals increased with Crx or Nrl expression levels at a rate much higher than  
51 expected for collisional FRET alone. Together, our results show the formation of Crx-Nrl  
52 complexes *in vivo* that are close enough for FRET.

Zhuo and Knox, 2021

## 53 **Introduction**

54 Vertebrate photoreceptors express a large array of genes (1) specifically related to  
55 phototransduction (2) and their unique cellular structures (3, 4), such as the outer  
56 segment (5, 6). Crx (7-9), an Otx-like protein that is a member of the *paired* homeodomain  
57 family, and Nrl (10, 11), a basic leucine zipper (bZIP) protein that is a member of the large  
58 Maf family, are key retinal transcription factors essential for photoreceptor function.  
59 Together, they regulate rod photoreceptor differentiation and gene expression (12, 13),  
60 are involved in the *in vitro* differentiation of stem cells into photoreceptors (14-17) and are  
61 implicated in human retinal diseases (18-22). Moreover, Crx and Nrl are expressed in  
62 medulloblastoma cells, where they activate photoreceptor genes and contribute to tumor  
63 maintenance (23). In addition to a direct role in causing retinal disease via alterations of  
64 their protein sequence, they also play an indirect role by regulating genes that cause  
65 inherited retinal degenerative diseases. For example, there are more than 90 genes  
66 linked to one or more of six commonly occurring retinal diseases (24). Many of these  
67 genes are directly regulated by Crx or Nrl (25) or have putative cis-regulatory DNA binding  
68 sites close to their transcription initiation sites (26). Crx and Nrl together regulate  
69 transcription initiation of numerous genes (26, 27) directly by binding to *cis*-regulatory  
70 elements in promoter regions (26-29), indirectly through chromatin modification (30-32),  
71 and by interacting with or regulating other transcription factors (10, 25).

72 A thorough understanding of Crx and Nrl structure and function is essential, not only  
73 for establishing the mechanistic basis of photoreceptor gene expression, but for  
74 developing new treatments for human disease. Genome-wide analysis has identified a  
75 consensus Crx (26, 33) and Nrl (34, 35) cis-regulatory sequences that cluster in or near

## Crx and Nrl Interactions Using FRET

76 rod photoreceptor genes, suggesting that Crx and Nrl together regulate them (26, 33).  
77 The localization of Crx-Nrl sites in proximal promoter regions reinforces functional and  
78 biochemical experiments that demonstrate cooperative action by Crx and Nrl to increase  
79 transcription (7, 36-38). In transiently transfected cultured cell lines, Crx and Nrl can  
80 individually activate transcription from rhodopsin and other photoreceptor-specific  
81 promoters, but together they do so synergistically (7, 36, 37). Crx and Nrl can bind to  
82 each other *in vitro* in the absence of DNA and can interact *in vivo* as inferred from yeast  
83 two-hybrid studies (36). Although the Nrl bZIP domain and the Crx homeodomain have  
84 roles in Crx-Nrl interaction *in vitro*, interaction appears to involve other regions of both  
85 proteins as well (36). Little is known about the underlying structural interface(s) that  
86 mediate complex formation, the structural basis for their transcriptional activity, protein-  
87 DNA or protein-protein interactions. The importance in understanding the structure-  
88 function relationships that result in Crx-Nrl cooperative transcriptional activity is  
89 highlighted by the fact that mutations in Crx or Nrl that reduce synergistic transactivation  
90 in cell transfection assays are linked to human retinopathies (20).

91 In this report, we describe the *in vivo* characterization of the interactions between Crx  
92 and Nrl in cultured mammalian cells. We utilized transiently transfected HEK293 cells, in  
93 which Crx-Nrl synergistically activate phototransduction gene promoter in transient  
94 transfection approaches (7, 36, 37). To measure FRET in living cells (39), we used either  
95 an improved FC-FRET approach, described here, or confocal microscopy FRET, CM-  
96 FRET (40). CM-FRET offers subcellular spatial resolution and the potential to observe  
97 movements of FRET partners by photobleaching methods (reviewed in (41, 42)).  
98 However, data collection with CM-FRET can be limited by both the number of cells that

Zhuo and Knox, 2021

99 can be processed and biases in cell selection. Previously, flow cytometry has been used  
100 for analysing FRET in populations of cells (43-51), including the interaction of transcription  
101 factors (49, 52). We adapted one FC-FRET method (49) in order to measure sensitized  
102 emission derived from donor-acceptor pairs and calibrated it using mCherry-eGFP (mG)  
103 fusion proteins separated by different length linkers. Using a combination of microscopy  
104 and flow cytometry, we characterized the interactions in living cells of Crx and Nrl fused  
105 to mCherry or eGFP and show interactions between these two transcription factors that  
106 are close enough for FRET.

107

## 108 **Results**

109

### 110 **Measurement of FRET by flow cytometry.**

111 Transiently transfected HEK293T cells have served as a convenient and rapid  
112 model system for the characterization of retinal transcription factors *in vivo* (e.g. (37)). We  
113 adapted an FC-FRET approach to measure apparent FRET efficiencies ( $N_{\text{FRET}}$ )  
114 determined by sensitized emission. For these studies, eGFP served as the donor and  
115 mCherry as the acceptor. Since our goal was to examine FRET between transcription  
116 factors, all protein constructs had a nuclear localization signal added to the N-terminus to  
117 direct expression exclusively to the nucleus. For each FC-FRET experiment (Figure S1),  
118 four control groups of cells were transfected with the following expression constructs:  
119 mock (empty pcDNA3.1), mCherry alone, eGFP alone, and unlinked mCherry plus eGFP  
120 (mCh+eG). Previous approaches estimated FRET by counting the number of cells that  
121 cross a threshold level of corrected  $F^{\text{DA}}$  intensity (Figure S2). In order to quantify FRET

## Crx and Nrl Interactions Using FRET

122 signals, we employed a well-established method (three cube, (53)) to determine  $N_{\text{FRET}}$  on  
123 a cell-by-cell basis. Subsequently, the population averages and partitions based upon  
124 donor-acceptor intensity levels were used. The four control groups were used to estimate  
125 expression levels (Figure S3) and background–bleed-through fluorescence (crosstalk) in  
126 the FRET channel (Figure S4). To calibrate actual FRET signals (Figures 1, S4, and S5),  
127 we used donor-acceptor fusion proteins (mG) which undergo intramolecular FRET when  
128 eGFP is excited. The fusion was accomplished through linkers (Supplemental Table 1)  
129 containing an  $\alpha$ -helix-forming peptide, EAAAK (54) repeated 2 to 7 times, and flanked on  
130 each side by a proline residue to terminate the  $\alpha$ -helical region. For both unlinked and  
131 mG constructs, fluorescence was observed uniformly in the nucleoplasm (Figure S6).  
132 There was an enrichment in the nucleolus compared to the nucleoplasm, with a mean  
133 ratio of  $\sim 2$  for both donor and acceptor fluorescence (*data not shown*). This is consistent  
134 with the behaviour of NLS which mediate RNA binding and nucleolar localization of  
135 fluorescent proteins (55).

136 FC-FRET produces sufficient cell numbers to restrict analysis to those that  
137 optimize the FRET signal to noise ratio (*e.g.*, Figure 1). To control for fluorescent protein  
138 expression levels which ranged over three orders of magnitude ( $<10^{-7}$  to  $\sim 2 \times 10^{-4}$  M,  
139 Figure S4), low expressing cells (with donor/acceptor fluorescence  $< \sim 3 \times 10^3$  FU, Figures  
140 S4, S5) were eliminated from analysis (Figure S5). Only cells with an expression ratio for  
141 mCherry:eGFP between 0.1 -10, the range over which the FRET efficiency is most stable  
142 (56), were included. A criterion  $F^{\text{DA}}$  level (fluorescence intensity in the acceptor channel  
143 when excited with the donor laser) was set so that no cells that expressed either mCherry  
144 or eGFP alone reached this  $F^{\text{DA}}$  intensity (Figure S5, similar to a previous report (43)).

Zhuo and Knox, 2021

145 Cells that meet the above criteria  $F^{DA}$  intensity were termed FRET-positive cells. With this  
146 optimization, ~80.0% mG fusion construct expressing cells and ~4-5% of mCh+eG  
147 expressing cells were classified as FRET-positive in typical experiments (Figures S4 and  
148 S5) and were used to calculate  $N_{FRET}$ . In a typical experiment, we observed a mean  $N_{FRET}$   
149 for mG10 expressing cells, expected to have a high FRET efficiency, that ranged from  
150 21-24% while mCh+eG cells, expected to exhibit background FRET efficiency, was less  
151 than 1.5% (Figures 1A and S5). This represents an order of magnitude range for  
152 comparison of  $N_{FRET}$  in transfected HEK293T cells.

153 In addition to the intrinsic FRET that depends on the close proximity of donor-  
154 acceptor fluorophores, stochastic or collisional FRET arises from transient interactions  
155 between donor and acceptor (57). Stochastic FRET is expected to linearly depend upon  
156 the concentration of freely diffusing donors and acceptors (57-59). To estimate the  
157 contribution of stochastic FRET to the signal measured by flow cytometry, we examined  
158 cells expressing mG fusion proteins with a wide range of acceptor and donor fluorescence  
159 levels (Figure S6). This is readily accomplished since the FRET signals are collected over  
160 the entire range of mG expression during flow cytometry (Figure S7). In cells expressing  
161 mCh+eG,  $N_{FRET}$  modestly increased as either acceptor (Figures 1B and S7A) or donor  
162 (Figure S7B) fluorescence levels increased. The dependence of  $N_{FRET}$  on acceptor  
163 concentration fit the stochastic FRET equation ((57-59), Figure S8), indicating that the  
164 mCh+eG samples gave an accurate measure of the stochastic FRET component. We  
165 also compared collisional FRET in cells expressing nuclear-localized mCh+eG with those  
166 expressing cytoplasmic mCh+eG and found the dependence on expression level was  
167 indistinguishable in the two cellular compartments (Figure S9), further supporting the

## Crx and Nrl Interactions Using FRET

168 identification of the mCh+eG signal with stochastic FRET. To characterize intrinsic FRET  
169 in the following experiments, we compared a population measure of FRET encompassing  
170 a range of expression levels ( $N_{\text{FRET}}$ ) and the FRET efficiency dependence on fluorophore  
171 concentration.

172

### 173 **Measurement of distance by FC-FRET.**

174 To quantify FRET efficiencies as a function of donor-acceptor distance, we  
175 analysed  $N_{\text{FRET}}$  from cells expressing mG fusion proteins with different linker lengths  
176 (Figure 1A, Figure S6). The linker design incorporated a rigid alpha helix (54) that has  
177 been studied by X-ray analysis and shown to influence FRET efficiency in a fusion protein  
178 between BFP and GFP *in vitro* (60-62). The two proline residues incorporated in the mG  
179 design should isolate the alpha helical segments proteins to reduce influences of relative  
180 orientation of the two fluorophores. Fusion proteins with linkers less than 15 amino acids  
181 all exhibited similar  $N_{\text{FRET}}$  either in single or when averaging multiple FC-FRET  
182 experiments (mG6-8, one way ANOVA:  $\alpha=0.05$ ,  $F=1.54$ ,  $p=0.29$ ; mG10 and mG15, t-test:  
183 mG-8 vs. mG10,  $p=0.227$ ; mG-8 vs. mG15,  $p=0.116$ ).  $N_{\text{FRET}}$  was very sensitive to lengths  
184 longer than 15 amino acids, with a steady reduction as linkers lengthened in individual  
185 (Figure 1A, *left*) or combined (Figure 1A, *right*) FC-FRET experiments (one way ANOVA,  
186 Holm-Sidak, pairwise comparison, all pairs have  $p<0.05$ ).

187 All mG fusion proteins exhibited an increase in FRET efficiency as acceptor  
188 (Figures 1B and S7A) or donor (Figure S7B) fluorescence intensities increased, but the  
189 vertical offsets and slopes varied. The mG series of fusion proteins had parallel curves  
190 that differed in the offset at all fluorescence levels (Figures 1B and S7). This offset



Zhuo and Knox, 2021

191 depended upon the linker length and represented the intrinsic FRET from the donor-  
192 acceptor pairs. There was a gradual increase in the slope at higher expression levels  
193 which was similar for all mG fusion proteins and was greater than that for mCh+eG. The  
194 cause of the increasing slope at higher tethered mCh+eG concentrations compared to  
195 untethered fluorophores is not clear; it may be due to multiple donor-acceptor interactions,  
196 either from concentration dependent association of fluorophores or collisions between  
197 tethered fluorophores. The effect of donor-acceptor expression level on FRET signals  
198 highlights the importance of comparing donor-acceptor pairs in the same concentration  
199 range to clearly distinguish the intrinsic and stochastic FRET signals in transfected cells  
200 (57-59).

201 To estimate the dependence of FRET efficiency on distance,  $R$ , between donor  
202 and acceptor, we fit  $N_{FRET}$  to the Förster equation (Figure 1C): 
$$N_{FRET} = \frac{R_o^6}{R_o^6 + (k_1 R + k_2)^6}$$
  
203 where  $R_o$  is Förster distance (5 nm for eGFP and 4.7 - 5.2 nm for mCherry (63-65)),  $k_1$  an  
204 orientation factor between the fluorescent proteins, and  $k_2$  is the minimal distance  
205 between two fluorophores determined by steric exclusion. The data was well fit to this  
206 equation using the predicted lengths of the alpha helical linkers (60-62). These results  
207 show that FC-FRET can quantitatively measure small differences in distance between  
208 donors and acceptors in living cells.

209

## 210 **Comparison of flow cytometry and confocal microscopy FRET**

211 We compared confocal microscopy and flow cytometry FRET with transfected cells  
212 expressing either mG10 or mCh+eG (Figure 2). Using sensitized emission CM-FRET  
213 (Figure 2A, B), cells expressing mG10 had a mean  $N_{FRET}$  of 9.9% (SD = 2.7%, n=37)

## Crx and Nrl Interactions Using FRET

214 while cells expressing mCh+eG had a mean  $N_{\text{FRET}}$  of 0.80% (SD = 1.09%, n=31). This is  
215 likely an underestimate of the actual FRET efficiency because sensitized emission  
216 methods are very sensitive to instrument settings and crosstalk between donor and  
217 acceptor channels. Using acceptor photobleaching CM-FRET (66) on fixed cells to  
218 eliminate diffusion into and out of the photobleached region (Figure 2C-E), cells  
219 expressing mG10 had a mean  $N_{\text{FRET}}$  of 26.8% (SD = 4.4%, n = 37) while cells expressing  
220 mCh+eG, had a mean  $N_{\text{FRET}}$  of 0.0% (SD = 2.2%, n= 31). For comparison, a typical FC-  
221 FRET experiment is shown (Figure 2G) where the mean  $N_{\text{FRET}}$  was 23.5% (SD=3.8%,  
222 n=6987), while for mCh+eG cells  $N_{\text{FRET}}$  was 0.4% (SD = 1.4%, n = 5267).

223       There is a wide range of expression levels in transiently transfected cells (Figures  
224 S3 and S5), but the large number of analysed cells allowed us to examine how donor or  
225 acceptor concentrations influenced FRET efficiency. The  $N_{\text{FRET}}$  for individual cells  
226 expressing mG10 or mCh+eG were plotted as a function of acceptor concentration  
227 (Figure 3H). The differences in  $N_{\text{FRET}}$  were relatively constant except at the highest  
228 acceptor concentrations, where  $N_{\text{FRET}}$  from the mG10 fusion protein increased more  
229 rapidly with concentration than mCh+eG. However, the population estimates for FC-  
230 FRET represent primarily the intrinsic FRET efficiency. Moreover, the estimated  $N_{\text{FRET}}$   
231 shows good agreement between FC-FRET and acceptor photobleaching CM-FRET  
232 efficiencies and qualitative agreement with sensitized emission CM-FRET. One possible  
233 reason for the difference in  $N_{\text{FRET}}$  measurements between FC-FRET and acceptor  
234 photobleaching CM-FRET is a potentially biased selection in the latter method of cells  
235 that have a high expression level. In addition, acceptor photobleaching CM-FRET uses a  
236 restricted subcellular region selected for measurement, with a potentially higher level of

Zhuo and Knox, 2021

237 fluorescence, while FC-FRET uses the fluorescence signal from entire cell. Nevertheless,  
238 these results show that FC-FRET is a quantitative method for determining FRET  
239 efficiency in a large number of cells rapidly with comparable sensitivity to microscopic  
240 methods.

241

## 242 **Measurement of FRET between Crx donor and acceptor.**

243 We used flow cytometry to examine potential FRET between individual human Crx  
244 molecules with terminal fusions with mCherry (m) or eGFP(e) (Figure 3A) expressed in  
245 HEK293T cells. Both mCrx (see Figure 3 legend for nomenclature) and Crxe were  
246 distributed exclusively in the nucleus and had a nonhomogeneous distribution (Figure  
247 3B).  $N_{\text{FRET}}$  was highest (3.3%,  $p < 0.001$ , one way ANOVA, Holm-Sidak, pairwise  
248 comparison with all other groups) when both donor and acceptor were fused to the N-  
249 terminus near the homeodomain (Figure 3C).  $N_{\text{FRET}}$  was lower when the fusion proteins  
250 were on the C-terminus following the activation domain and not significantly different  
251 compared to mCh+eG (1.6%,  $p = 0.452$ , one way ANOVA, Holm-Sidak).  $N_{\text{FRET}}$  was at  
252 background levels comparable with mCh+eG when the fusion proteins were on different  
253 termini (Crxm+eCrx,  $p = 0.828$  and mCrx+Crxe,  $p = 0.917$ , one way ANOVA, Holm-Sidak).  
254 Cells transfected with Crx fusion proteins together with a soluble fluorescent protein also  
255 exhibited background FRET signals (Figure 3C).

256 We examined the FRET signal from the various Crx fusion proteins as a function  
257 of expression level.  $N_{\text{FRET}}$  was significantly higher at all fluorescence levels when both  
258 donor and acceptor were fused to the N-terminus near the homeodomain (mCrx+eCrx)  
259 in comparison to all other combinations (Figure 3D). The slope for the mCrx+eCrx pair

## Crx and Nrl Interactions Using FRET

260 increased much faster as expression levels increased compared to mCh+eG or pairs with  
261 fluorophores on opposite termini (eCrx+Crxm and Crxe+mCrx), which were similar to  
262 mCh+eG at all concentrations.  $N_{\text{FRET}}$  for constructs with fluorophores fused to the C-  
263 terminus near the activation domain (Crxe+Crxm) were intermediate between  
264 mCrx+eCrx, showing elevated  $N_{\text{FRET}}$  at higher expression levels than expected from  
265 stochastic FRET alone (57). These data indicate that a fraction of Crx molecules  
266 expressed in HEK293T cells are close enough for FRET, with fusions having both donor  
267 and acceptor near the homeodomain giving larger FRET signals than with fusions both  
268 near the activation domains. These results suggest that the FRET-detectable fraction of  
269 Crx molecules is arranged in a head to head fashion.

270

### 271 **Measurement of FRET between Nrl donor and acceptor.**

272 We used flow cytometry to examine potential FRET between individual human Nrl  
273 molecules with terminal fusions with mCherry or eGFP (Figure 3A) expressed in  
274 HEK293T cells. Both mNrl and Nrle were distributed exclusively in the nucleus and had  
275 a nonhomogeneous distribution (Figure 3B).  $N_{\text{FRET}}$  was highest (5.3%) and significantly  
276 different from all other groups ( $p < 0.001$ , one way ANOVA, Holm-Sidak, pairwise  
277 comparison) when both donor and acceptor were fused to the C-terminal bZIP domain  
278 (Figure 3C).  $N_{\text{FRET}}$  was lower (2.5%) when the fluorescent proteins were both fused to the  
279 N-terminus but was significantly different than mCh+eG ( $p < 0.001$ , one way ANOVA Holm-  
280 Sidak).  $N_{\text{FRET}}$  was at background levels for Nrlm+eNrl ( $p = 0.349$ , one way ANOVA, Holm-  
281 Sidak, compare with mCh+eG) but slightly higher for mNrl+Nrle (2.1%,  $p = 0.013$ , one way  
282 ANOVA, Holm-Sidak). This may reflect differences in relative angles between the

Zhuo and Knox, 2021

283 fluorophores in the two complementary pairs. Control experiments in which cells were  
284 transfected with an Nrl-fusion protein and a soluble fluorescence protein (mCherry or  
285 eGFP) exhibited  $N_{\text{FRET}}$  comparable to mCh+eG (Figure 3C).

286 We examined the FRET signal from the various Nrl fusion proteins as a function  
287 of expression level. Fusions to the C-terminus, near the bZip DNA binding domain, did  
288 not give expression levels as high as fusions to the N-terminus or for Crx fusion proteins  
289 (compare Figures 3D and 3F). However,  $N_{\text{FRET}}$  was much higher at all fluorescence levels  
290 when both donor and acceptor were fused to the C-terminus (Nrlm+Nrlc) in comparison  
291 to all other combinations (Figure 3F). The slope for the Nrlm+Nrlc pair increased faster  
292 as expression levels increased compared to mCh+eG.  $N_{\text{FRET}}$  from constructs with  
293 fluorophores fused to the N-terminus near the activation domain (mNrl+eNrl) also  
294 increased with expression level much faster than mCh+eG (Figure 3F). When  
295 fluorophores were fused to opposite termini (mNrl+Nrlc, and Nrlm+eNrl),  $N_{\text{FRET}}$  behaviour  
296 diverged for reasons that are not clear. The mNrl+Nrlc pair had similar  $N_{\text{FRET}}$  compared  
297 to mNrl+eNrl pair in the overlapping expression range, which was higher than mCh+eG.  
298 The other combination, Nrlm+eNrl, was similar to mCh+eG. The elevated  $N_{\text{FRET}}$  for three  
299 of the four Nrl combinations, particularly Nrlm+Nrlc, were higher than expected from  
300 stochastic FRET alone (57). These data indicate that a fraction of Nrl molecules  
301 expressed in HEK293T cells are close enough for FRET, with fusions having both donor  
302 and acceptor near the DNA binding domain giving larger FRET signals than with fusions  
303 both near the activation domains. These results suggest that the FRET-detectable  
304 fraction of Nrl molecules is arranged in a head to head fashion. The FRET efficiency for

## Crx and Nrl Interactions Using FRET

305 the C-terminal FRET pair is similar to that observed (~ 4%) for a heterodimer of Fos and  
306 Jun, both of which are bZIP proteins (49).

307

### 308 **Measurement of FRET between Crx and Nrl donor-acceptor pairs.**

309 We used flow cytometry to examine potential FRET between individual Crx and  
310 Nrl molecules with terminal fusions with mCherry or eGFP (Figure 3A) expressed in  
311 HEK293T cells. The nuclear distribution pattern for both Crx and Nrl when expressed in  
312 the same cell were similar but not identical (Figure 3B). We observed FRET between Crx  
313 and Nrl with a number of donor-acceptor fusion pairs (Figure 4A). Fusions at the N-termini  
314 of Nrl and Crx had the highest  $N_{\text{FRET}}$  compared to mCh+eG ( $p=0.001$ , one way ANOVA,  
315 Holm-Sidak). Fusions with fluorophores both located at the C-termini of Crx and Nrl had  
316  $N_{\text{FRET}}$  higher than mCh+eG but it was not statistically significant ( $p=0.45$ , one way  
317 ANOVA, Holm-Sidak). Constructs with donor and acceptor on opposite termini were not  
318 different from mCh+eG (Figure 4A).

319 We examined FRET from the various combinations of fusion proteins as a function  
320 of expression level (Figure 4B).  $N_{\text{FRET}}$  from constructs with both donor and acceptor fused  
321 to the N-terminus (mNrl+eCrx) was statistically higher than mCh+eG at all fluorescence  
322 levels and than the other combinations when  $F^A > 10^4$ . The slope for the mNrl+eCrx pair  
323 increased faster as expression levels increased compared to mCh+eG, suggesting a  
324 possible concentration dependence on the proximity of mNrl and eCrx. The FRET signals  
325 for the other fusion constructs increased with expression level similar to mCh+eG. What  
326 is clear from the dependence on expression level is that the FRET signal from mNrl+eCrx  
327 is much higher than expected from stochastic FRET alone (57). These data indicate that

Zhuo and Knox, 2021

328 a fraction of Nrl and Crx molecules when expressed in HEK293T cells are close enough  
329 to FRET, with fusions having donor near the DNA binding domain of Crx and acceptor  
330 near the activation domain of Nrl giving large FRET signals.

331 We compared  $N_{\text{FRET}}$  between mCrx and eNrl using FC-FRET to those measured  
332 with CM-FRET (Figure 4C). Both acceptor photobleaching and sensitized emission  
333 approaches had significant  $N_{\text{FRET}}$  for N-terminal fused mNrl+eCrx when compared to  
334 mCh+eG (t-test,  $p < 0.001$ , respectively). These data agree with the results from the FC-  
335 FRET experiments. The CM-FRET methods gave a higher estimated efficiency because  
336 the measurements were performed on nuclear regions with high fluorescence levels  
337 where both donor and acceptor overlap, while the FC-FRET measurements are derived  
338 from the entire nucleus, which may underestimate locally confined interactions. Taken  
339 together, these results confirm that a fraction of Crx and Nrl molecules in HEK293T nuclei  
340 are close enough for FRET.

341

## 342 **Discussion**

### 343 *Flow cytometry FRET*

344 Here, we report improvements in the use of flow cytometry to measure FRET  
345 efficiency (43-51). We showed that FC-FRET is sensitive enough to detect subtle  
346 differences in donor-acceptor linker lengths, and thus distance. In our implementation, we  
347 have a delay between exposure of cells to donor (488 nm) and acceptor (561 nm)  
348 excitation lasers, thus avoiding crosstalk between fluorescent proteins in the detection  
349 channels during their fluorescence lifetimes. Our implementation of FC-FRET employs  
350 one of the most widely used sensitized emission methods, called  $N_{\text{FRET}}$  (67), to calculate

## Crx and Nrl Interactions Using FRET

351 FRET efficiency.  $N_{\text{FRET}}$  minimizes the dependence of FRET efficiency on the donor and  
352 acceptor fluorescence intensities. However,  $N_{\text{FRET}}$  deviates dramatically from expected  
353 behaviour when the stoichiometry of donor or acceptor are not matched well (42). We are  
354 able to address this issue by selecting cells with a desired acceptor/donor ratio where  
355  $N_{\text{FRET}}$  is stable (56), here between 0.1 - 10 range.

356 We have standardized data acquisition and analysis. The FC-FRET results  
357 quantitatively agree with measurements made using two common microscopy-based  
358 methods and are comparable between different transfections and flow cytometry runs.  
359 FC-FRET analysis uses individual cell FRET efficiencies for statistical analysis and  
360 includes information on donor and acceptor fluorescence intensities. Thus, FC-FRET  
361 efficiencies are obtained across a wide range of expression levels. This allows the  
362 contribution of stochastic FRET to be characterized. FRET efficiency is determined from  
363 total cellular fluorescence, which potentially reduces bias in the (subjective) collection of  
364 cells with intense fluorescence. In summary, we have shown that FC-FRET is able to  
365 quantitatively study protein-protein interactions in live cells in a high-throughput manner.

366 Although FC-FRET has advantages, it shares several limitations with whole-cell  
367 microscopy and solution methods. FC-FRET does not provide detailed information on  
368 subcellular distribution, only measures average fluorescence intensity for each cell. If a  
369 donor and acceptor are concentrated in a particular location, the stochastic FRET  
370 efficiency could be higher than expected and thus be mistaken for protein-protein  
371 interactions. Therefore, it is imperative to design control fluorescent proteins that  
372 appropriately colocalize and produce the same expression levels as the candidate  
373 proteins for comparison. FC-FRET sensitivity is limited by the fraction of donor and



Zhuo and Knox, 2021

374 acceptor that can interact with each other. For example, if the donor and acceptor only  
375 interact in certain compartments, but are also found in other compartments, then the  
376 apparent FRET efficiency will be reduced. A strategy that combines microscopy and flow  
377 cytometry would overcome this limitation.

### 378 *FRET between Nrl and Crx molecules*

379 We obtained FRET efficiencies between Crx and Nrl that likely reflect dimer  
380 interactions of these transcription factor in *in vivo* complexes. A qualitative summary of  
381 the FRET signals and possible schematic models for the various complexes are shown  
382 (Figure 5). Our results show that a fraction of Nrl donor and acceptor fusion proteins,  
383 when expressed in the same cell, are close enough to generate a large FRET signal. The  
384 same was found with Crx donor and fusion pairs co-expressed in the same cell. These  
385 results support the conclusion that both Crx and Nrl can assemble into homodimers (or  
386 oligomers with two Crx or Nrl molecules near each other) in live cells. We found that  
387 placing donors and acceptors near the DNA binding domains (bZip for Nrl and  
388 homeodomain for Crx) gave the largest FRET signals for Nrl-Nrl or Crx-Crx pairs. These  
389 results are consistent with a parallel orientation of oligomeric Crx (head-to-head) or Nrl  
390 (tail-to-tail). In the case of Crx and Nrl,  $N_{\text{FRET}}$  was small but significantly greater than  
391 mCh+eG controls. Moreover,  $N_{\text{FRET}}$  steadily increased as expression levels increased  
392 (Figure 4B), at a rate much faster than observed for stochastic FRET. In this way, FC-  
393 FRET allows a direct examination across the entire range of fluorophore expression,  
394 permitting a qualitative separation of the FRET signal into intrinsic and stochastic  
395 components by comparison with co-expressed, unlinked donor and acceptor. This is  
396 particularly important when FRET efficiency between interacting proteins is low because

## Crx and Nrl Interactions Using FRET

397 of distance, fluorophore orientation, competing cellular binding partners or influence of  
398 the  $K_D$  on extent of interaction, as examples. However, the strong FRET signals from Crx  
399 and Nrl donor-acceptor pairs, distinctly higher than control donor-acceptor pairs,  
400 demonstrate formation of Crx-Nrl complexes in live nuclei for the first time. This data is  
401 consistent with biochemical (36) and functional data (7, 36, 37) that show their interaction  
402 suggests possible mechanisms for their cooperative activity.

403 It is important to emphasize that we do not know what fraction of donor or  
404 acceptors expressed in the nuclei of HEK293T are available to interact or potentially  
405 participate in FRET. We are not able to determine that FRET fraction using CM-FRET  
406 approaches – additional studies require techniques such as single molecule FRET (68,  
407 69). Because of this limitation, we are not able to estimate even relative distances  
408 between the donor and acceptors fused to Crx or Nrl. However, Nrl is part of the large  
409 Maf family and forms homo- and heterodimers with other bZip transcription factors (35).  
410 Therefore, it seems likely that Nrl will not be monomeric in HEK293T cells, rather we  
411 expect that Nrl could be in complexes with itself or other proteins as there are other Mafs  
412 and bZip proteins expressed in HEK293T cells (70). If we make the simplifying  
413 assumption that all the expressed Nrl protein was involved in FRET interactions, then  
414 using the calibration of  $N_{\text{FRET}}$  from the mG fusion series and assuming similar donor-  
415 acceptor orientations, the FC-FRET data (Figure 2E) would imply that the donor and  
416 acceptors at the C-terminal (bZip) region between Nrl monomers are ~6-7 nm apart, much  
417 closer than ~10 nm FRET detection limit. Using the total fluorescence intensity in the  
418  $N_{\text{FRET}}$  calculation leads to an underestimation of the actual FRET efficiency and thus  
419 proximity. Nonetheless,  $N_{\text{FRET}}$  estimates seem reasonable given the following distance

Zhuo and Knox, 2021

420 estimates: 1) the structure of the closely related MafA (DNA binding domains for the MafA  
421 dimer bound to DNA are ~1 nm apart, PDB ID: 4EOT (71)), 2) the diameter of donor-  
422 acceptor molecules (~2.5 nm, (72)) and 3) the length of the (Gly)<sub>5</sub> linkers between the  
423 fluorophores and Nrl (~2 nm). This calculation further supports the identification of the  
424  $N_{\text{FRET}}$  measure with FC-FRET as a true proximity indicator.

425

## 426 **Conclusions**

427 We have developed FC-FRET, an improved flow cytometry-based FRET method that  
428 validated using confocal microscopy FRET methods. The most significant advantage is  
429 the ability to analyze FRET signals from cells with a wide range of expression levels. The  
430 permits a separation of the FRET signal into intrinsic and stochastic components. Using  
431 this approach, we have observed interactions and proposed orientations between Nrl and  
432 Crx homodimers. Moreover, we have shown for the first time an interaction between Crx  
433 and Nrl in live cells.

434

## 435 **Materials and Methods**

### 436 *Expression constructs*

437 Fusion constructs and large deletions were generated by overhang extension PCR (73)  
438 using primers from IDT (IDT, Coralville, IA) and cloned Pfu DNA polymerase (Stratagene,  
439 La Jolla, CA). Point mutations and small deletions or insertions were generated using  
440 QuickChange (74) with Turbo Pfu DNA polymerase (Stratagene, La Jolla, CA). A nuclear  
441 localization signal (NLS), MAPKKRKRKVNRSKA, was added at the N-termini of eGFP and  
442 mCherry (Clontech, Mountain View, CA). For intramolecular FRET experiments, eGFP

## Crx and Nrl Interactions Using FRET

443 and mCherry fusion proteins (mG) were designed with various linkers (Supplemental  
444 Table 1). The  $\alpha$ -helical linkers were based on a repeated (n=2-7)  $\alpha$ -helix-forming peptide,  
445 EAAAK (27) flanked by two proline residues to terminate the  $\alpha$ -helical region. For  
446 expression of Nrl and Crx fusion proteins, coding regions were cloned downstream of the  
447 CMV promoter in derivatives of the pEGFP-N1 plasmid (Clontech) with an NLS and linker  
448 sequences to eGFP or mCherry (Supplemental Table 2). All constructs were confirmed  
449 by DNA sequencing (Genewiz, [www.genewiz.com](http://www.genewiz.com)).

450

### 451 *Mammalian cell culture and transfection*

452 HEK293T cells (ATCC, Manassas, VA) were cultured in DMEM supplemented with 10%  
453 FBS and 1 mM L-glutamine. Cells were seeded at 75,000 cells/ml one day before  
454 transfection. Cells were transfected with a total of 1  $\mu$ g of DNA using Fugene 6 (Roche,  
455 Branchburg, NJ) according to the manufacturer's instructions

456

### 457 *Confocal Microscopy FRET*

458 In sensitized emission FRET and live cell imaging experiments, HEK293T cells were  
459 seeded on a collagen coated No. 1 coverslip placed in the bottom of a 3.5 cm dish  
460 (MatTek, Ashland, MA) before transfection. One day after transfection, cells were placed  
461 in phenol red-free DMEM (Gibco, Carlsbad, CA) containing 0.1  $\mu$ g/ml Hoechst 33342  
462 (Sigma-Aldrich, St. Louis, MO), 10% FBS and 1 mM L-glutamine and incubated for one  
463 hour. Cells were then placed in the environmental chamber (PeCon GmbH, Germany) of  
464 the confocal microscope in 5% CO<sub>2</sub> at 37°C and equilibrated for 15 min. Confocal images  
465 were collected using a LSM510 META microscope (Carl Zeiss, Germany) equipped with

Zhuo and Knox, 2021

466 a Plan-Apochromat 63× oil immersion objective (NA 1.4) and an Argon laser (488 nm)  
467 and a HeNe laser (543 nm). The pinhole was adjusted to obtain 1 Airy unit for the 488 nm  
468 laser. To reduce contamination signals between the two fluorescence channels, 500-535  
469 nm band pass and 560LP long pass filters were used to filter fluorescence excited by Ar  
470 and HeNe lasers, respectively. The FRET signal was detected using the Argon laser 488  
471 nm line and a 560LP long pass filter. Hoechst 33342 staining was detected using a two-  
472 photon Chameleon laser exciting at 800 nm (power 4-8%) and a 435/485 nm band pass  
473 filter. For dual color acquisition, 12-bit images were sequentially acquired in a line-scan  
474 mode (average of two scans). The images were filtered by one-time Gaussian blur (0.5  
475 sigma) in ImageJ (NIH) to reduce noise. The fluorescence intensity for sensitized FRET  
476 analysis was quantified from the filtered images ( $N_{\text{FRET}}$ , details described in FC-FRET  
477 section). For presentation in the figures, filtered image brightness and contrast were  
478 adjusted using ImageJ for the entire image. In APB FRET, HEK293T cells were seeded  
479 in 8 well chamber slides (Nunc Lab-Tek), transfected as described above and then fixed  
480 with 2% paraformaldehyde for 15 min. Slides were mounted in glycerol prior to image  
481 acquisition as described above. Acceptor was sequentially photobleached using the  
482 HeNe laser at 100% power. Images were analyzed using Image J software (NIH) and  
483 Sigma Plot 11.0 (Systat Software, Inc., Chicago, IL).

484

#### 485 *Flow cytometry FRET*

486 Cells were transfected as described above, treated with 0.1% trypsin for 5 min and then  
487 washed in phenol red-free DMEM containing 10% FBS. Cells were centrifuged at 250 g  
488 for 5 min and suspended with phosphate buffered saline at  $\sim 10^6$  cells/ml. FC-FRET

## Crx and Nrl Interactions Using FRET

489 measurements were performed using a LSRII flow cytometer (BD Bioscience) equipped  
490 with 405 nm, 488 nm, 561 nm and 633 nm lasers. A 19  $\mu$ s delay was set between 488  
491 nm and 561 nm laser interrogation times. To measure eGFP and FRET fluorescence  
492 intensities, cells were excited with the 488 nm laser line with fluorescence collected in the  
493 eGFP channel through a 530/30 band pass filter, while the FRET signal was collected  
494 through a 610/20 band pass filter. To measure mCherry fluorescence, cells were excited  
495 with the 561 nm laser line and fluorescence was collected through a 610/20 band pass  
496 filter. Channel settings were optimized and calibrated as follows. First, the voltage of each  
497 photomultiplier was adjusted to balance the fluorescence intensity for eGFP and mCherry.  
498 Second, the fluorescence intensity for each channel was calibrated with beads having  
499 known amounts of fluorophore attached (Spherotech, Inc.). Finally, the FSC (forward  
500 scattering) and SSC (side scattering) were calibrated with beads of known size  
501 (Spherotech, Inc). The concentration of fluorescence molecules was estimated by the  
502 fluorescence intensity and estimated size of each cells. We calibrated the fluorescence  
503 intensity and size measurement with Spherotech beads as described above. We  
504 converted intensity to equivalent brightness of fluorescence dyes (such as eGFP). We  
505 use this number to estimate the number of fluorescence molecules in a cell. We used the  
506 size standard beads to estimate the size of cells with FSC and SSC reading. We assume  
507 a HEK293 cell can approximate to a spherical ball in a solution. Based on this assumption,  
508 we estimate the volume of each cell and then the concentration of fluorescence molecules  
509 based on the number of fluorescence molecules in a cell.

510 For each experiment, four control groups were analysed. Mock transfected cells  
511 were used to set background fluorescence levels for donor, FRET and acceptor channels.

Zhuo and Knox, 2021

512 Cells expressing only eGFP were used to measure the bleed-through of donor emission  
513 (eGFP) into the FRET channel (610/20), calculated as the ratio of donor emission  
514 detected in the FRET (acceptor) channel to donor channel,  $D_C$ . Similarly, cells expressing  
515 only mCherry were used to measure the excitation of acceptor (mCherry) by donor  
516 excitation light (488 nm), calculated as the ratio of acceptor emission with donor excitation  
517 to acceptor fluorescence,  $A_C$ . The variation in  $D_C$  and  $A_C$  between cells decreased as  
518 both acceptor and donor fluorescence intensity increased, respectively, and we used a  
519 value of 30% variation in  $D_C$  and  $A_C$  to set the lower limit of eGFP and mCherry intensities  
520 for including cells in the analysis. We used a sensitized emission calculation, also called  
521 the three-cube method (53), to determine the normalized FRET efficiency in FC-FRET:

$$N_{FRET} = \frac{F^{DA} - A_C * F^D - D_C F^A}{\sqrt{F^D \times F^A}}$$

522  
523 where  $F^{DA}$ ,  $F^D$  and  $F^A$  are the fluorescence intensities in the FRET, donor and acceptor  
524 channels, respectively. Flow cytometry data files were imported to custom software for  
525 data processing in the Matlab (Mathworks, Inc) environment (executable program  
526 available upon request). Different group mean or median values were compared with  
527 Student's t-test (if normality test failed, a Mann-Whitney Rank Sum test was used) or  
528 ANOVA analysis (Holm-Sidak method) in Sigma Plot 11.0 (Systat Software, Inc.,  
529 Chicago, IL) using  $p < 0.05$ (\*),  $p < 0.01$ (\*\*) and  $p < 0.001$ (\*\*\*).

530

### 531 *Simulation of stochastic (collisional) FRET*

532 To simulate the effect of concentration on unlinked donor-acceptor fluorophores,  
533 we used the approach as described by Lakowicz for freely diffusing donor-acceptor pairs  
534 (57-59). To calculate the FRET efficiency for collisional events we used

## Crx and Nrl Interactions Using FRET

535  $E = \sqrt{\pi} \times \Gamma \times \exp(\Gamma^2) \times |1 - \text{erf}(\Gamma)|$  , where  $\Gamma = \frac{[A]}{A_0}$  is the ratio of effective acceptor  
536 concentration to the critical concentration  $A_0$ , which represents the acceptor concentration  
537 that results in 76% energy transfer. In the case of mCherry and eGFP, we calculated the  
538 stochastic FRET to be greater than ~1% when the concentrations of mCherry and eGFP  
539 are higher than ~20  $\mu\text{M}$  (Figure S8A). The result of the acceptor concentration dependent  
540 FRET measurement with mCherry and eGFP is close to this value (~10  $\mu\text{M}$ ), suggesting  
541 the FRET efficiency above this level will have a stochastic FRET component. However,  
542 this analysis of stochastic FRET does not include an exclusion volume for large  
543 fluorophores. To include that variable in simulations of a three dimensional collisional  
544 system, we used a Monte Carlo approach based on a randomized static distribution of  
545 acceptors and donors (Figure S8B) to calculate the FRET efficiency by proximity using  
546 the Förster equation and summing over the closest pairs. In this simulation, we used  $\kappa^2 =$   
547 0.476 (instead of 2/3), resulting in an energy transfer for eGFP-mCherry at the critical  
548 concentration,  $A_0 = 3.6 \text{ mM}$ , to be  $E = 76\% \times \frac{0.476}{0.667} = 54\%$  . The simulations (using in  
549 MatLab (Natick, MA), R2012b) were performed over a range of concentrations (total  
550 molecules 50-600) in volumes of spheres with radii of 100-600 nm and differing distance  
551 constraints (3-6 nm) for the FRET efficiency calculation. A total of 21 random distributions  
552 were used to generate Figure S8C.

### 553 **Acknowledgments**

554 This work was supported in part by the National Institutes of Health grants EY-11256 and  
555 EY-12975 (B.E.K.) and the Research to Prevent Blindness (Unrestricted Grant to SUNY  
556 UMU Department of Ophthalmology). We thank Dr. S. Reks critical comments on this  
557 work as it progressed.



## References

1. S. Blackshaw, R. E. Fraioli, T. Furukawa, C. L. Cepko, Comprehensive analysis of photoreceptor gene expression and the identification of candidate retinal disease genes. *Cell* **107**, 579-589 (2001).
2. V. Y. Arshavsky, M. E. Burns, Photoreceptor signaling: supporting vision across a wide range of light intensities. *J Biol Chem* **287**, 1620-1626 (2012).
3. R. S. Molday, O. L. Moritz, Photoreceptors at a glance. *J Cell Sci* **128**, 4039-4045 (2015).
4. J. N. Pearing, R. Y. Salinas, S. A. Baker, V. Y. Arshavsky, Protein sorting, targeting and trafficking in photoreceptor cells. *Prog Retin Eye Res* **36**, 24-51 (2013).
5. K. M. Bujakowska, Q. Liu, E. A. Pierce, Photoreceptor Cilia and Retinal Ciliopathies. *Cold Spring Harb Perspect Biol* **9**, a028274 (2017).
6. H. May-Simera, K. Nagel-Wolfrum, U. Wolfrum, Cilia - The sensory antennae in the eye. *Prog Retin Eye Res* **60**, 144-180 (2017).
7. S. Chen *et al.*, Crx, a novel Otx-like paired-homeodomain protein, binds to and transactivates photoreceptor cell-specific genes. *Neuron* **19**, 1017-1030 (1997).
8. T. Furukawa, E. M. Morrow, C. L. Cepko, Crx, a novel otx-like homeobox gene, shows photoreceptor-specific expression and regulates photoreceptor differentiation. *Cell* **91**, 531-541 (1997).
9. A. K. Hennig, G. H. Peng, S. Chen, Regulation of photoreceptor gene expression by Crx-associated transcription factor network. *Brain Res* **1192**, 114-133 (2008).
10. A. Swaroop, D. Kim, D. Forrest, Transcriptional regulation of photoreceptor development and homeostasis in the mammalian retina. *Nat Rev Neurosci* **11**, 563-576 (2010).
11. A. Swaroop *et al.*, A conserved retina-specific gene encodes a basic motif/leucine zipper domain. *Proc Natl Acad Sci U S A* **89**, 266-270 (1992).
12. T. Furukawa, E. M. Morrow, T. Li, F. C. Davis, C. L. Cepko, Retinopathy and attenuated circadian entrainment in Crx-deficient mice. *Nat Genet* **23**, 466-470 (1999).
13. A. J. Mears *et al.*, Nrl is required for rod photoreceptor development. *Nat Genet* **29**, 447-452 (2001).
14. H. Y. Chen, K. D. Kaya, L. Dong, A. Swaroop, Three-dimensional retinal organoids from mouse pluripotent stem cells mimic in vivo development with enhanced stratification and rod photoreceptor differentiation. *Mol Vis* **22**, 1077-1094 (2016).
15. J. Collin *et al.*, CRX Expression in Pluripotent Stem Cell-Derived Photoreceptors Marks a Transplantable Subpopulation of Early Cones. *Stem Cells* **37**, 609-622 (2019).
16. A. Gonzalez-Cordero *et al.*, Recapitulation of Human Retinal Development from Human Pluripotent Stem Cells Generates Transplantable Populations of Cone Photoreceptors. *Stem Cell Reports* **9**, 820-837 (2017).
17. D. A. Lamba, J. Gust, T. A. Reh, Transplantation of human embryonic stem cell-derived photoreceptors restores some visual function in Crx-deficient mice. *Cell Stem Cell* **4**, 73-79 (2009).
18. D. A. Bessant *et al.*, A mutation in NRL is associated with autosomal dominant retinitis pigmentosa. *Nat Genet* **21**, 355-356 (1999).

## Crx and Nrl Interactions Using FRET

19. C. L. Freund *et al.*, Cone-rod dystrophy due to mutations in a novel photoreceptor-specific homeobox gene (CRX) essential for maintenance of the photoreceptor. *Cell* **91**, 543-553 (1997).
20. A. Kanda, J. S. Friedman, K. M. Nishiguchi, A. Swaroop, Retinopathy mutations in the bZIP protein NRL alter phosphorylation and transcriptional activity. *Hum Mutat* **28**, 589-598 (2007).
21. K. M. Nishiguchi *et al.*, Recessive NRL mutations in patients with clumped pigmentary retinal degeneration and relative preservation of blue cone function. *Proc Natl Acad Sci U S A* **101**, 17819-17824 (2004).
22. P. K. Swain *et al.*, Mutations in the cone-rod homeobox gene are associated with the cone-rod dystrophy photoreceptor degeneration. *Neuron* **19**, 1329-1336 (1997).
23. A. Garancher *et al.*, NRL and CRX Define Photoreceptor Identity and Reveal Subgroup-Specific Dependencies in Medulloblastoma. *Cancer Cell* **33**, 435-449 e436 (2018).
24. S. K. Verbakel *et al.*, Non-syndromic retinitis pigmentosa. *Prog Retin Eye Res* **66**, 157-186 (2018).
25. J. W. Kim *et al.*, NRL-Regulated Transcriptome Dynamics of Developing Rod Photoreceptors. *Cell Rep* **17**, 2460-2473 (2016).
26. J. C. Corbo *et al.*, CRX ChIP-seq reveals the cis-regulatory architecture of mouse photoreceptors. *Genome Res* **20**, 1512-1525 (2010).
27. H. Hao *et al.*, Transcriptional regulation of rod photoreceptor homeostasis revealed by in vivo NRL targetome analysis. *PLoS Genet* **8**, e1002649 (2012).
28. M. J. Brooks, H. K. Rajasimha, J. E. Roger, A. Swaroop, Next-generation sequencing facilitates quantitative analysis of wild-type and Nrl(-/-) retinal transcriptomes. *Mol Vis* **17**, 3034-3054 (2011).
29. M. A. Kautzmann, D. S. Kim, M. P. Felder-Schmittbuhl, A. Swaroop, Combinatorial regulation of photoreceptor differentiation factor, neural retina leucine zipper gene NRL, revealed by in vivo promoter analysis. *J Biol Chem* **286**, 28247-28255 (2011).
30. A. Mo *et al.*, Epigenomic landscapes of retinal rods and cones. *Elife* **5**, e11613 (2016).
31. G. H. Peng, S. Chen, Active opsin loci adopt intrachromosomal loops that depend on the photoreceptor transcription factor network. *Proc Natl Acad Sci U S A* **108**, 17821-17826 (2011).
32. P. A. Ruzycki, X. Zhang, S. Chen, CRX directs photoreceptor differentiation by accelerating chromatin remodeling at specific target sites. *Epigenetics Chromatin* **11**, 42 (2018).
33. J. Lee, C. A. Myers, N. Williams, M. Abdelaziz, J. C. Corbo, Quantitative fine-tuning of photoreceptor cis-regulatory elements through affinity modulation of transcription factor binding sites. *Gene Ther* **17**, 1390-1399 (2010).
34. T. K. Kerppola, T. Curran, A conserved region adjacent to the basic domain is required for recognition of an extended DNA binding site by Maf/Nrl family proteins. *Oncogene* **9**, 3149-3158 (1994).
35. T. K. Kerppola, T. Curran, Maf and Nrl can bind to AP-1 sites and form heterodimers with Fos and Jun. *Oncogene* **9**, 675-684 (1994).
36. K. P. Mitton *et al.*, The leucine zipper of NRL interacts with the CRX homeodomain. A possible mechanism of transcriptional synergy in rhodopsin regulation. *J Biol Chem* **275**, 29794-29799 (2000).

37. S. E. Reks, V. McIlvain, X. Zhuo, B. E. Knox, Cooperative activation of *Xenopus* rhodopsin transcription by paired-like transcription factors. *BMC Mol Biol* **15**, 4 (2014).
38. M. A. White *et al.*, A Simple Grammar Defines Activating and Repressing cis-Regulatory Elements in Photoreceptors. *Cell Rep* **17**, 1247-1254 (2016).
39. J. Piehler, New methodologies for measuring protein interactions in vivo and in vitro. *Curr Opin Struct Biol* **15**, 4-14 (2005).
40. D. W. Piston, G. J. Kremers, Fluorescent protein FRET: the good, the bad and the ugly. *Trends Biochem Sci* **32**, 407-414 (2007).
41. R. N. Day, M. W. Davidson, Fluorescent proteins for FRET microscopy: monitoring protein interactions in living cells. *Bioessays* **34**, 341-350 (2012).
42. A. Zeug, A. Woehler, E. Neher, E. G. Ponimaskin, Quantitative intensity-based FRET approaches--a comparative snapshot. *Biophys J* **103**, 1821-1827 (2012).
43. C. Banning *et al.*, A flow cytometry-based FRET assay to identify and analyse protein-protein interactions in living cells. *PLoS One* **5**, e9344 (2010).
44. F. K. Chan *et al.*, Fluorescence resonance energy transfer analysis of cell surface receptor interactions and signaling using spectral variants of the green fluorescent protein. *Cytometry* **44**, 361-368 (2001).
45. L. He *et al.*, Flow cytometric measurement of fluorescence (Forster) resonance energy transfer from cyan fluorescent protein to yellow fluorescent protein using single-laser excitation at 458 nm. *Cytometry A* **53**, 39-54 (2003).
46. L. He *et al.*, A flow cytometric method to detect protein-protein interaction in living cells by directly visualizing donor fluorophore quenching during CFP-->YFP fluorescence resonance energy transfer (FRET). *Cytometry A* **55**, 71-85 (2003).
47. L. He, A. C. Grammer, X. Wu, P. E. Lipsky, TRAF3 forms heterotrimers with TRAF2 and modulates its ability to mediate NF- $\kappa$ B activation. *J Biol Chem* **279**, 55855-55865 (2004).
48. L. Tron *et al.*, Flow cytometric measurement of fluorescence resonance energy transfer on cell surfaces. Quantitative evaluation of the transfer efficiency on a cell-by-cell basis. *Biophys J* **45**, 939-946 (1984).
49. G. Vamosi *et al.*, Conformation of the c-Fos/c-Jun complex in vivo: a combined FRET, FCCS, and MD-modeling study. *Biophys J* **94**, 2859-2868 (2008).
50. X. You *et al.*, Intracellular protein interaction mapping with FRET hybrids. *Proc Natl Acad Sci U S A* **103**, 18458-18463 (2006).
51. X. Wu *et al.*, Prestin-prestin and prestin-GLUT5 interactions in HEK293T cells. *Dev Neurobiol* **67**, 483-497 (2007).
52. B. Camuzeaux, C. Spriet, L. Heliot, J. Coll, M. Duterque-Coquillaud, Imaging Erg and Jun transcription factor interaction in living cells using fluorescence resonance energy transfer analyses. *Biochem Biophys Res Commun* **332**, 1107-1114 (2005).
53. D. C. Youvan *et al.*, Calibration of fluorescence resonance energy transfer in microscopy using genetically engineered GFP derivatives on nickel chelating beads. *Biotechnology et alia.*, 1-18 (1997).
54. S. Marqusee, R. L. Baldwin, Helix stabilization by Glu-...Lys+ salt bridges in short peptides of de novo design. *Proc Natl Acad Sci U S A* **84**, 8898-8902 (1987).
55. A. Kitamura, Y. Nakayama, M. Kinjo, Efficient and dynamic nuclear localization of green fluorescent protein via RNA binding. *Biochem Biophys Res Commun* **463**, 401-406 (2015).

## Crx and Nrl Interactions Using FRET

56. C. Berney, G. Danuser, FRET or no FRET: a quantitative comparison. *Biophys J* **84**, 3992-4010 (2003).
57. J. R. Lakowicz, *Principles of Fluorescence Spectroscopy* (Springer, Boston, MA, ed. 3rd, 2006), pp. 954.
58. M. G. Erickson, D. L. Moon, D. T. Yue, DsRed as a potential FRET partner with CFP and GFP. *Biophys J* **85**, 599-611 (2003).
59. E. S. Butz *et al.*, Quantifying macromolecular interactions in living cells using FRET two-hybrid assays. *Nat Protoc* **11**, 2470-2498 (2016).
60. R. Arai, H. Ueda, A. Kitayama, N. Kamiya, T. Nagamune, Design of the linkers which effectively separate domains of a bifunctional fusion protein. *Protein Eng* **14**, 529-532 (2001).
61. R. Arai, W. Wriggers, Y. Nishikawa, T. Nagamune, T. Fujisawa, Conformations of variably linked chimeric proteins evaluated by synchrotron X-ray small-angle scattering. *Proteins* **57**, 829-838 (2004).
62. W. Wriggers, S. Chakravarty, P. A. Jennings, Control of protein functional dynamics by peptide linkers. *Biopolymers* **80**, 736-746 (2005).
63. M. Tramier, M. Zahid, J. C. Mevel, M. J. Masse, M. Coppey-Moisan, Sensitivity of CFP/YFP and GFP/mCherry pairs to donor photobleaching on FRET determination by fluorescence lifetime imaging microscopy in living cells. *Microsc Res Tech* **69**, 933-939 (2006).
64. L. Albertazzi, D. Arosio, L. Marchetti, F. Ricci, F. Beltram, Quantitative FRET analysis with the EGFP-mCherry fluorescent protein pair. *Photochem Photobiol* **85**, 287-297 (2009).
65. N. Akrap, T. Seidel, B. G. Barisas, Forster distances for fluorescence resonant energy transfer between mCherry and other visible fluorescent proteins. *Anal Biochem* **402**, 105-106 (2010).
66. H. Amiri, G. Schultz, M. Schaefer, FRET-based analysis of TRPC subunit stoichiometry. *Cell Calcium* **33**, 463-470 (2003).
67. Z. Xia, Y. Liu, Reliable and global measurement of fluorescence resonance energy transfer using fluorescence microscopes. *Biophys J* **81**, 2395-2402 (2001).
68. R. Roy, S. Hohng, T. Ha, A practical guide to single-molecule FRET. *Nat Methods* **5**, 507-516 (2008).
69. E. Lerner *et al.*, FRET-based dynamic structural biology: Challenges, perspectives and an appeal for open-science practices. *Elife* **10** (2021).
70. M. Malm *et al.*, Evolution from adherent to suspension: systems biology of HEK293 cell line development. *Sci Rep* **10**, 18996 (2020).
71. X. Lu, G. P. Guanga, C. Wan, R. B. Rose, A novel DNA binding mechanism for maf basic region-leucine zipper factors inferred from a MafA-DNA complex structure and binding specificities. *Biochemistry* **51**, 9706-9717 (2012).
72. M. Ormo *et al.*, Crystal structure of the *Aequorea victoria* green fluorescent protein. *Science* **273**, 1392-1395 (1996).
73. R. Higuchi, B. Krummel, R. K. Saiki, A general method of in vitro preparation and specific mutagenesis of DNA fragments: study of protein and DNA interactions. *Nucleic Acids Res* **16**, 7351-7367 (1988).
74. J. Braman, C. Papworth, A. Greener, Site-directed mutagenesis using double-stranded plasmid DNA templates. *Methods Mol Biol* **57**, 31-44 (1996).

Zhuo and Knox, 2021

## FIGURES

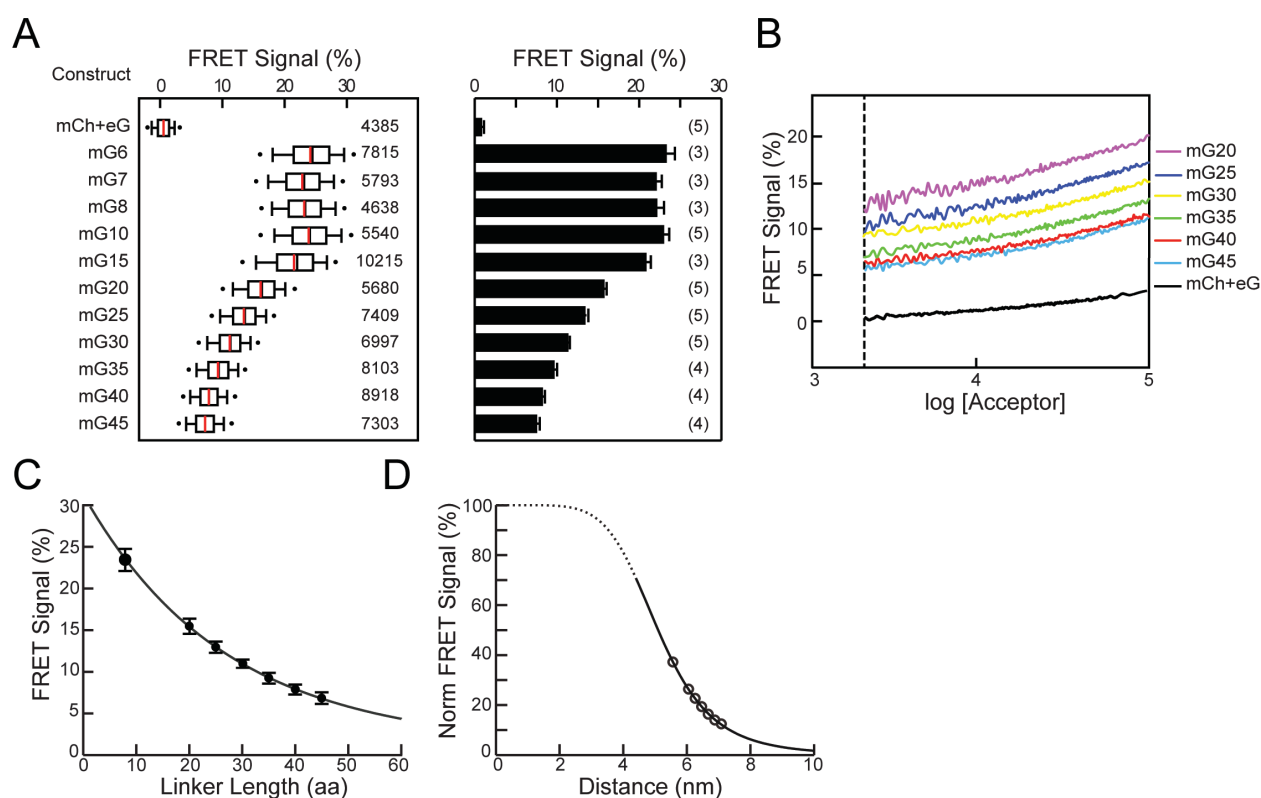

**Figure 1. Flow cytometry FRET.**

A) Comparison of FRET signals ( $N_{\text{FRET}}$ ) between mCherry and eGFP fusion constructs (mGx) that contain linkers of different length ( $x = \text{number of amino acids}$ ) in a single flow cytometry run (*left panel*) or averaged over multiple experiments (*right panel*). For the single experiment, results are shown as box plot, with mean (*red lines*) and median (*black lines*) values indicated, with the number of cells analysed to the right of the box. For averaged experiments, mean values with SEM of the FRET signals are shown in a bar graph, with the number of experiments in parentheses. B) The FRET signals from cells expressing mG20-45 from a single flow cytometry run. The distribution range of cell acceptor fluorescence intensities was divided into intervals with 100 cells in each bin. In the intensity plot, a moving average of  $N_{\text{FRET}}$  was calculated and are plotted versus the acceptor intensity in that bin. Error bars are suppressed for clarity. C) Mean  $N_{\text{FRET}}$  with SEM from the averaged experiments (A) are plotted as a function of linker length for mG8 and mG20-45. The line is a fit ( $R^2 = 0.998$ ) to the Förster equation modified to use linker length with the parameters  $k_1 = 0.27$ ,  $k_2 = 5.56$ . (D) Normalized FRET signals from C plotted as a function of predicted distance fit to the FRET equation (*solid black line*) with the same parameters in C. Dashed line indicates the inaccessible distance between mCherry and eGFP due to steric volume exclusion between the two fluorescent proteins.

## Crx and Nrl Interactions Using FRET

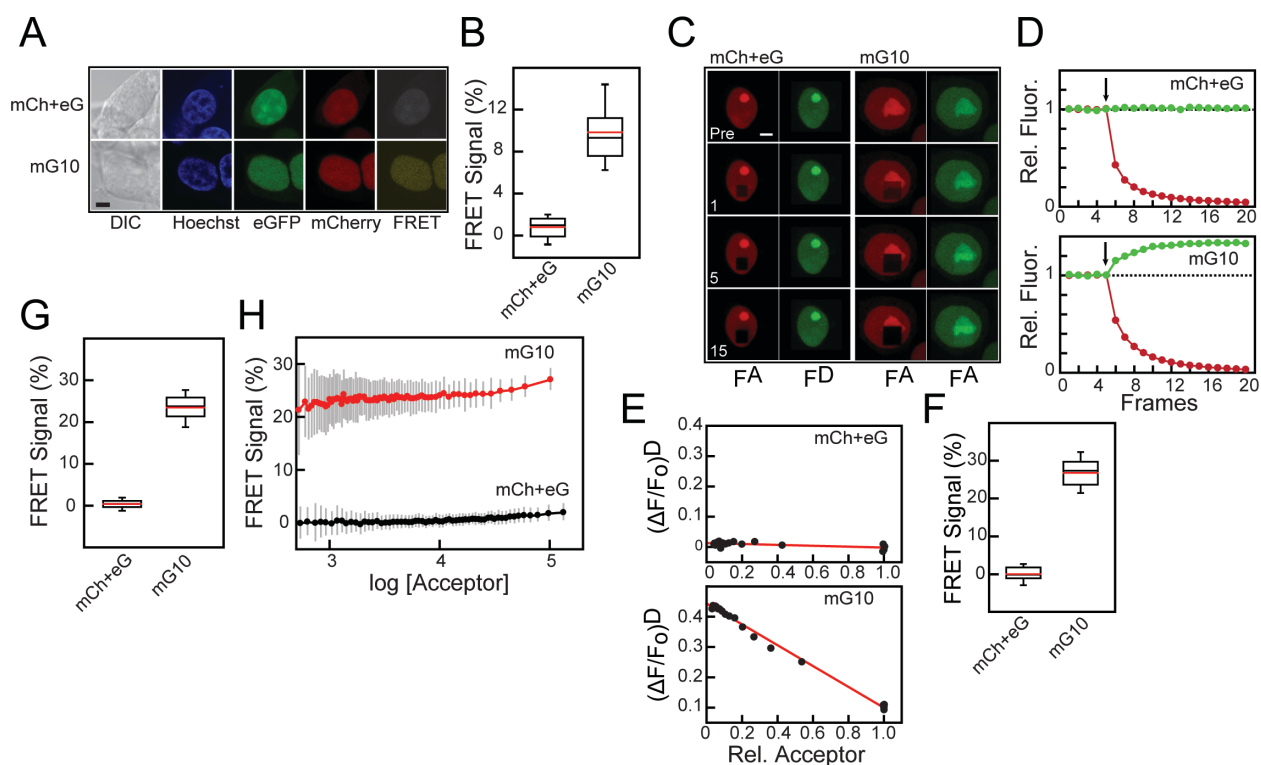

**Figure 2. Comparison of confocal microscopy and flow cytometry FRET.**

A) Confocal microscopy images show HEK293 cells expressing both mCh and eG (mCh+eG, *top panels*) or an mCherry-eGFP fusion protein with a 10 amino acid linker (mG10, *bottom panels*). DIC, Hoechst (*blue*), eGFP (*green*), mCherry (*red*), FRET (*yellow*). Scale bar is 5  $\mu$ m. B) Box plot showing the mean (*red line*) and median (*black line*) for sensitized emission  $N_{\text{FRET}}$  for mG10 ( $n=37$ ) and mCh+eG ( $n=31$ ). C) Sequential confocal microscopy images of cells expressing mCh+eG (*left panels*) and mG10 (*right panels*) before and after photobleaching. Regions were bleached after each frame with a 543 nm laser and imaged in both mCherry and eGFP channels before bleaching (*Pre*) and after 1, 5 and 15 laser pulses as. D) Fluorescence intensity changes during acceptor photobleaching in cells from (C) expressing mCh+eG (*top panel*) or mG10 (*bottom panel*). mCherry intensity (*red*) and eGFP intensity (*green*) are shown. Arrow indicates start of photobleaching. E) Plots summarizing fluorescence changes after sequential bleaching with 543 nm laser. The ordinate is the remaining acceptor fluorescence while the abscissa the fraction of donor fluorescence remaining. Measurements of relative fluorescence intensity after each bleaching laser pulse are shown (*black circles*) and the lines are a linear fit. F) Box plots showing the mean (*red lines*) and median (*black lines*)  $N_{\text{FRET}}$  from acceptor photobleaching experiments for mG10 ( $n=37$ ) and mCh+eG ( $n=31$ ). G) FRET signals obtained in a flow cytometry experiment for individual cells expressing mG10 (*red*) or mCh+eG (*black*). A moving average of  $N_{\text{FRET}}$  was calculated for bins of 100-cells and are plotted versus the acceptor intensity in that bin. Error bars (*grey*) are standard deviations. H) Box plots showing the mean (*red lines*) and median (*black lines*)  $N_{\text{FRET}}$  from flow cytometry experiments for cells expressing mCh+eG ( $n=5267$ ) or mG10 ( $n=6987$ ).

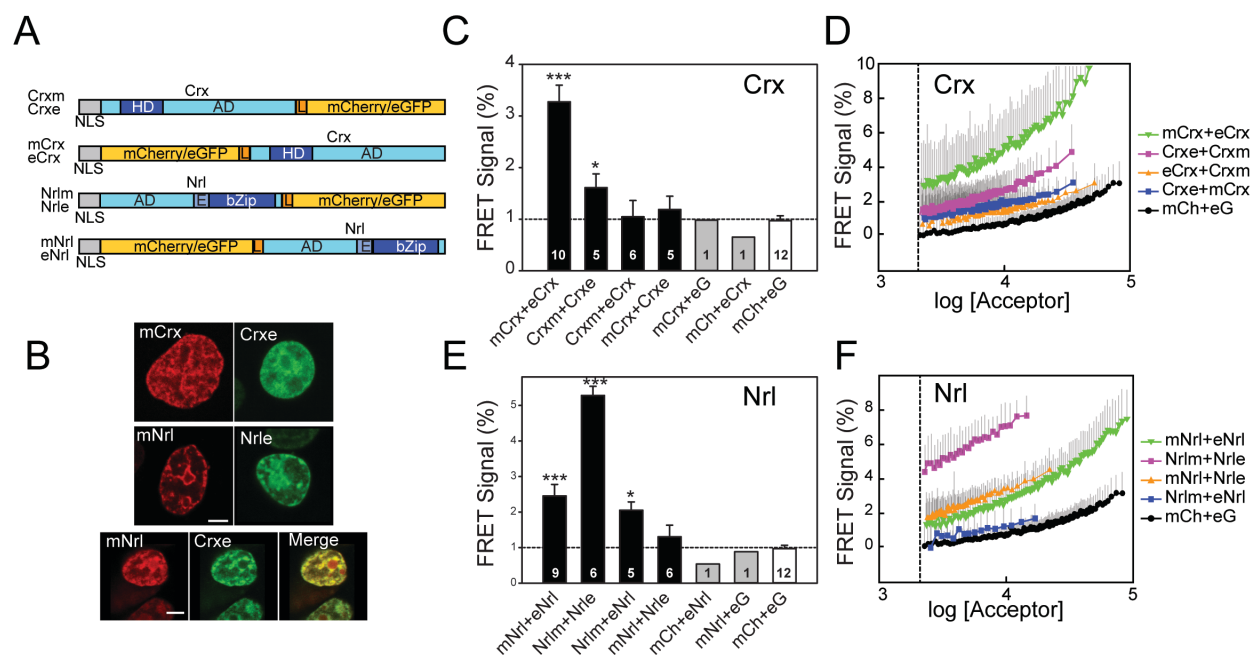

**Figure 3. FRET between fluorescently tagged Crx and Nrl homo-pairs.**

A) Fluorescent Crx and Nrl constructs used for FRET analysis. Diagram illustrates the fusions between fluorophores (mCherry and eGFP) and at the N and C-termini of Crx or Nrl. All constructs have an N-terminal nuclear location signal (NLS). Domains of Crx and Nrl are indicated: activation domains (AD), homeodomain (HD), basic leucine zipper domain (bZip), and linkers (L). The constructs are labeled with the fluorophore (m: mCherry or e: eGFP) at the beginning or end of the label depending upon the terminus to which it is fused. For example, mNrl is Nrl with mCherry fused to the N-terminus. B) Confocal microscopy images of transiently transfected HEK293T cells expressing fluorescently tagged Nrl labeled (*top row*), Crx (*middle row*) and both Crx and Nrl (*bottom panel*, which also contains a merged image). All constructs exhibit almost exclusively nuclear staining, with a patchy intranuclear pattern. Scale bars are 5  $\mu$ m. C, E) Comparison of FRET signals determined by flow cytometry using HEK293T cells cotransfected with combinations of donor-acceptor Crx (C) or Nrl (E) fusion constructs as indicated in the panel. The bars represent mean values with standard errors of the FRET signals from the indicated number of flow cytometry experiments. For each experiment, more than 1000 cells were analyzed. Statistical significance was performed using ANOVA (compared with mCh+eG cells):  $p < 0.05$  (\*) and  $p < 0.001$  (\*\*\*). The samples with only a single flow cytometry experiment were not used in the ANOVA. The dotted line indicated the mean FRET signal for mCh+eG. D, F) FRET signals in individual cells expressing combinations of donor and acceptor fused to Crx (D) or Nrl (F) are plotted as a function of acceptor fluorescence intensity. Symbols are the mean FRET signal in each bin (100 cells) and lines are moving averages. Error bars (grey) are the SD, only the positive SD is plotted for clarity. Cells with fluorescence values below threshold fluorescence intensity (*dashed line*) were not included in the analysis.

### Crx and Nrl Interactions Using FRET

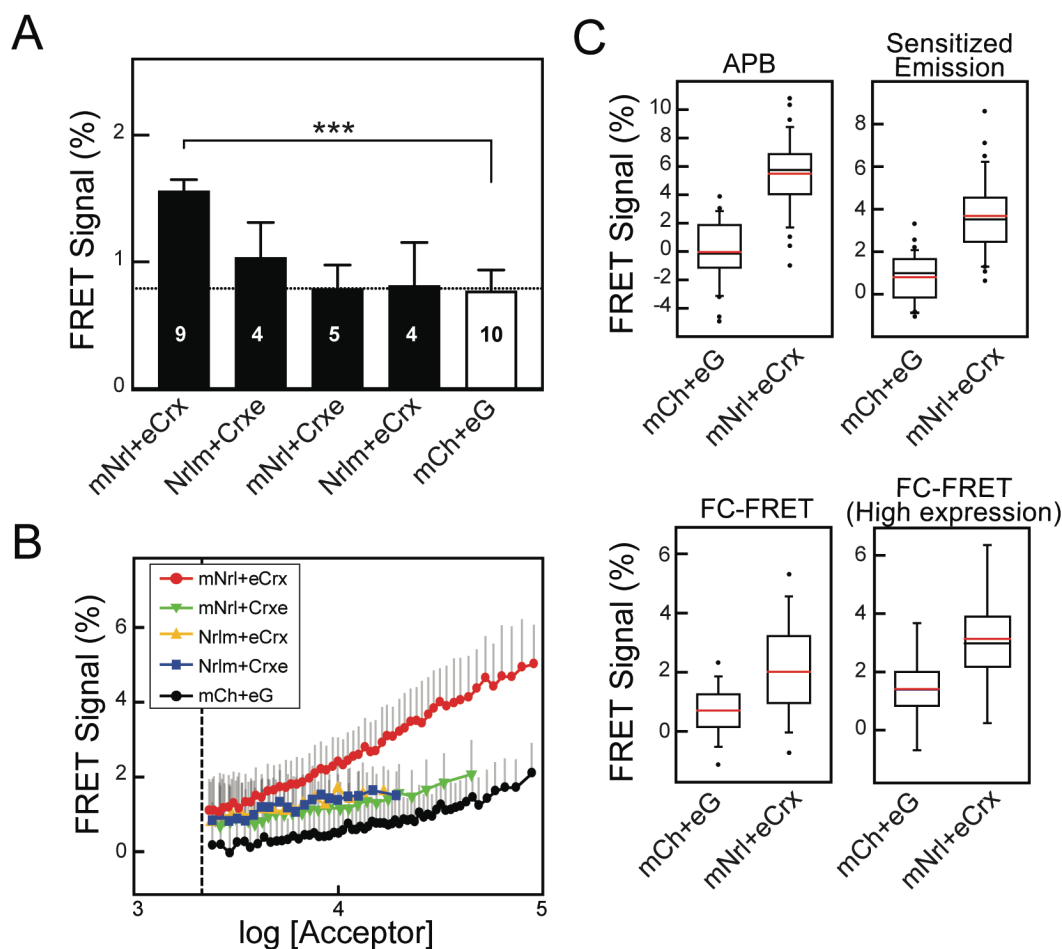

**Figure 4. FRET between fluorescently tagged Crx and Nrl hetero-pairs.**

A) Comparisons of FRET signals determined by flow cytometry using HEK293T cells cotransfected with combinations of donor-acceptor Crx and Nrl fusion constructs as indicated. The bars represent mean  $N_{FRET}$  with standard errors from the indicated number of flow cytometry experiments indicated. For each experiment, more than 1000 cells were analyzed. The dotted line indicates the mean FRET signal for mCh+eG. Statistical significance was determined by ANOVA and pairwise comparisons with mCh+eG cells:  $p < 0.001$  (\*\*\*). B) FRET signals in individual cells expressing combinations of donor and acceptor fused to Crx and Nrl as indicated are plotted as a function of acceptor fluorescence intensity. Symbols are the mean FRET signal in each bin (100 cells) and lines are moving averages. Error bars (grey) are the SD, only the positive SD is plotted for clarity. Cells with fluorescence values below threshold fluorescence intensity (dashed line) were not included in the analysis. C) Box plot comparisons of FRET signals for Crx-Nrl donor and acceptors measured by microscopy-based FRET (APB and Sensitized Emission) and one flow cytometry FRET experiment. The numbers of cells analyzed (mCh+eG/mNrl+eCrx): APB,  $n = 31/34$ ; Sensitized Emission,  $n = 31/34$ ; FC-FRET,  $n = 6996/8237$ ; FC-FRET (High-expression,  $F^A > 10^4$ ),  $n = 1031/953$ . Mean (red lines) and median (black lines)  $N_{FRET}$  are indicated. Statistical significance for each comparison was significant by t-test with  $P < 0.001$  (\*\*\*).



Zhuo and Knox, 2021

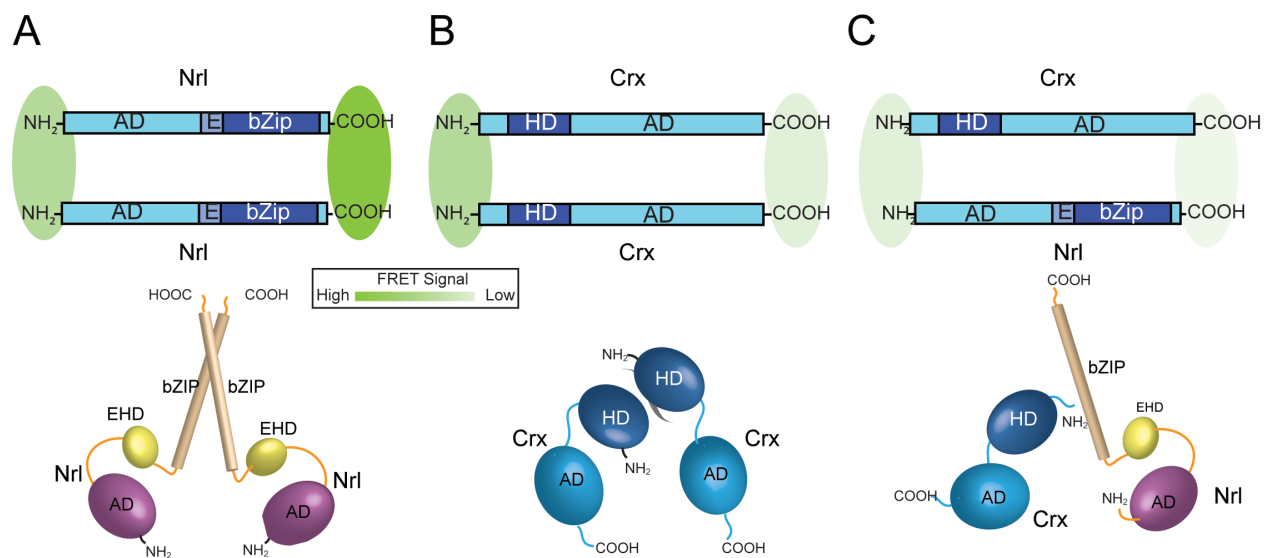

**Figure 5. Models of Nrl and Crx interactions based on FRET signals.**

*Upper Diagrams.* Schematic diagrams illustrating possible arrangements of Nrl (A) and Crx (B) homodimers and Nrl-Crx heterodimer (C). The intensity of the FRET signals obtained for the various combinations (Figures 4 and 5) are illustrated as green shaded ovals, with the intensity of the color representing the relative FRET signals for the various constructs. *Lower Diagrams:* Speculative three-dimensional arrangement of the various domains in Nrl and Crx complexes.

## Crx and Nrl Interactions Using FRET

### Supplementary Materials

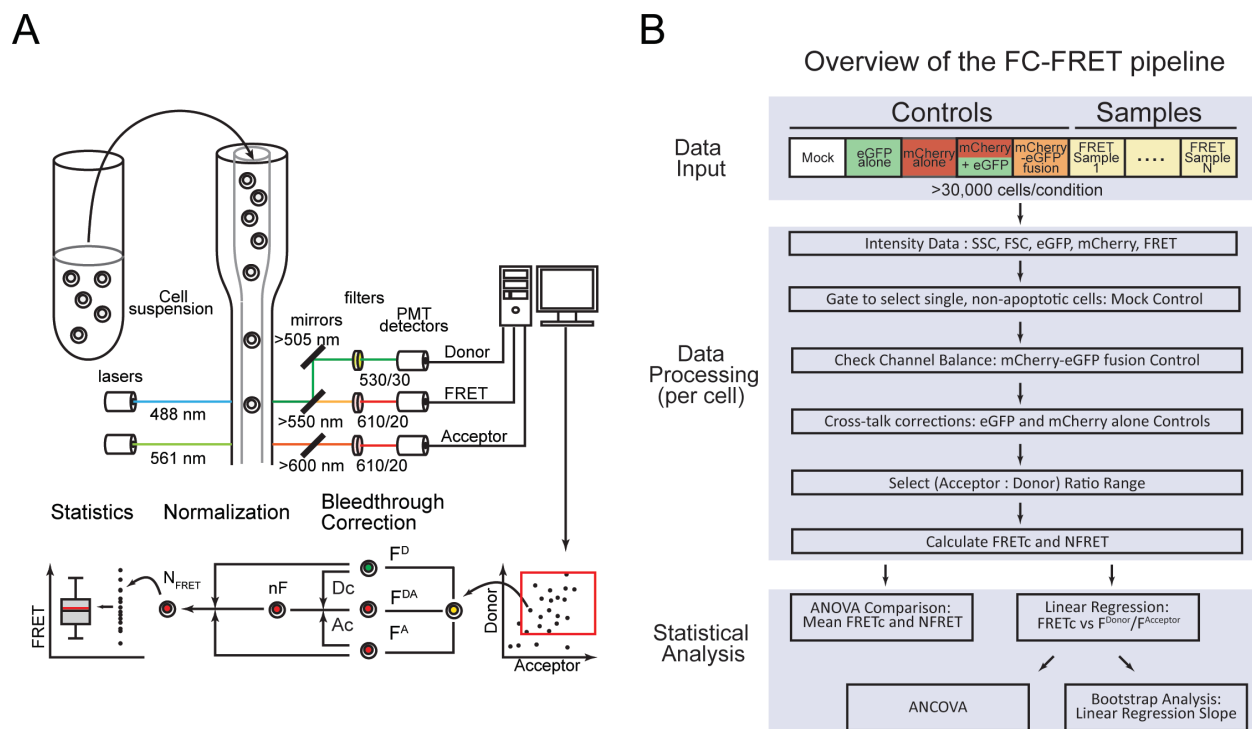

**Figure S1. Flow cytometry to detect FRET signals.**

The experiment setup (A) and data processing workflow (B) of flow cytometry-based FRET. Live HEK293T cells were transfected with nuclear localized mCherry-eGFP fusion proteins (mG) or transcription factors tagged with either mCherry or eGFP. Cells were analysed on a BD LSRII flow cytometer. Cells were transported in a sheath fluid and streamed to the laser beams for interrogation. Two lasers, 488 nm and 561 nm were used in this system with different focusing positions. The 488 nm laser excited eGFP and FRET signals, which were directed through 530/30 and 610/20 optical filters to the donor ( $F^D$ ) and FRET PMT Channels ( $F^{DA}$ ) accordingly. The 561 nm laser excited the mCherry signal that was directed through 610/20 optical filters to the acceptor PMT Channel ( $F^A$ ). The FRET signal ( $F^{DA}$ ) was corrected for background fluorescence, spill-over from donor (Dc) and excitation of acceptor (Ac). The corrected FRET signal was normalized with donor and acceptor signal to generate the FRET signal ( $N_{\text{FRET}}$ ). The cell by cell FRET result then underwent further desired statistical analysis.

Zhuo and Knox, 2021

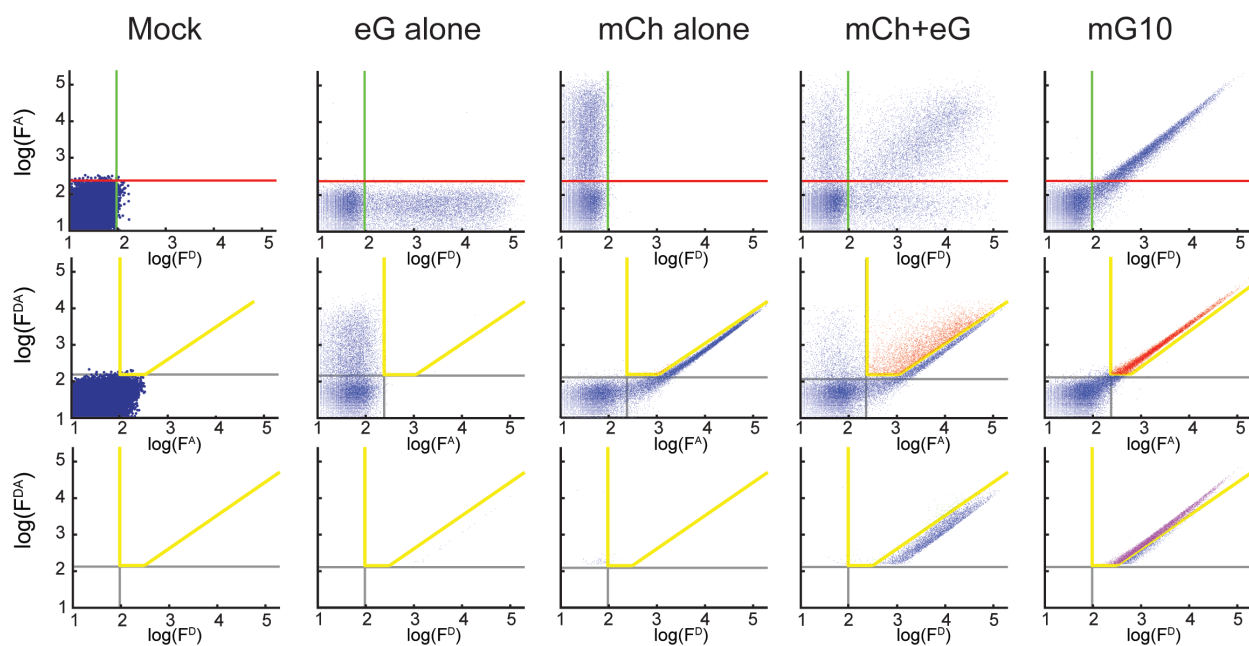

**Figure S2. Fluorescence intensity distributions in HEK293T cells transfected with fluorophores analysed by multichannel flow cytometry.**

Distributions of the five cell populations used in FC-FRET analysis: eGFP ( $F^D$ ), mCherry ( $F^A$ ) and FRET ( $F^{DA}$ ) fluorescence intensities. The threshold levels for eGFP (*green*) and mCherry (*red*) fluorescence channels are shown in the top row. The FRET threshold levels after correcting for background, spill over and crosstalk are shown (yellow). Cells that cross over the FRET threshold are shown in red. Although the cell number is readily determined for the various samples, it is not possible to determine a FRET efficiency with cell counts alone. This limits the sensitivity of flow cytometry methods based on this strategy.

### Crx and Nrl Interactions Using FRET

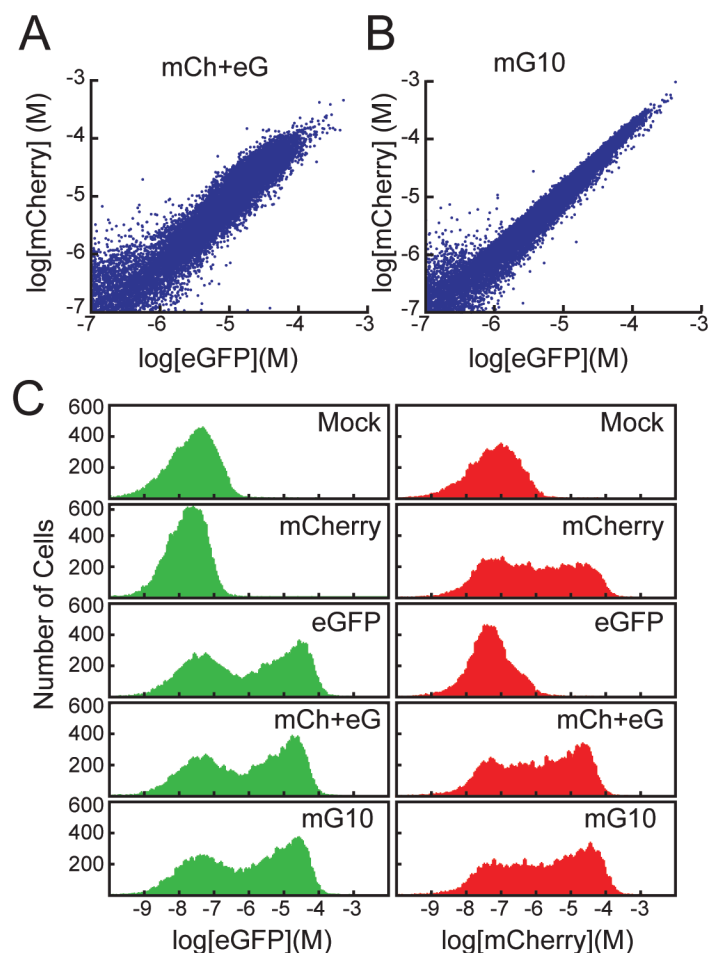

**Figure S3. Expression levels and fluorescence intensities in transfected HEK293T cells.**

A, B) Scatter plots of mCherry (*red*) and eGFP (*green*) concentration in HEK293T cells transfected with mCh+eG (A) and mG10 (B). Concentrations were determined from the flow data as described in Methods. C) Histograms of mCherry and eGFP expression levels in cells mock transfected or expressing mCherry, eGFP, mCherry and eGFP or an mCherry-eGFP fusion protein separated by 10 amino acids.

Zhuo and Knox, 2021

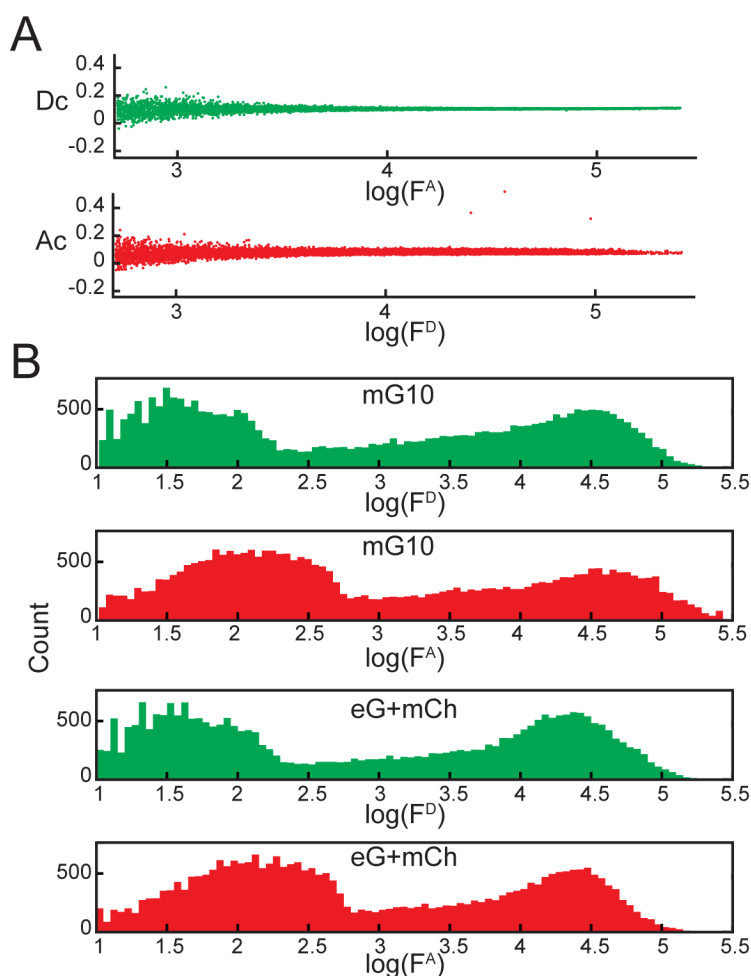

**Figure S4. Comparison of the crosstalk corrections and fluorescence distributions in cells expressing fluorescent proteins analyzed by multichannel flow cytometry.**

A) Scatterplots of the donor (Dc, *top panel*) and acceptor (Ac, *bottom panel*) crosstalk corrections used to adjust the fluorescence levels prior to calculation of FRET signal. The top panel uses fluorescence from cells expressing eGFP only while the lower panel is from cells expressing mCherry only. B) Histograms of mCherry and eGFP fluorescence levels in cells transfected with mG10 fusion protein (*upper pair*) or mCherry and eGFP (*lower pair*).

### Crx and Nrl Interactions Using FRET

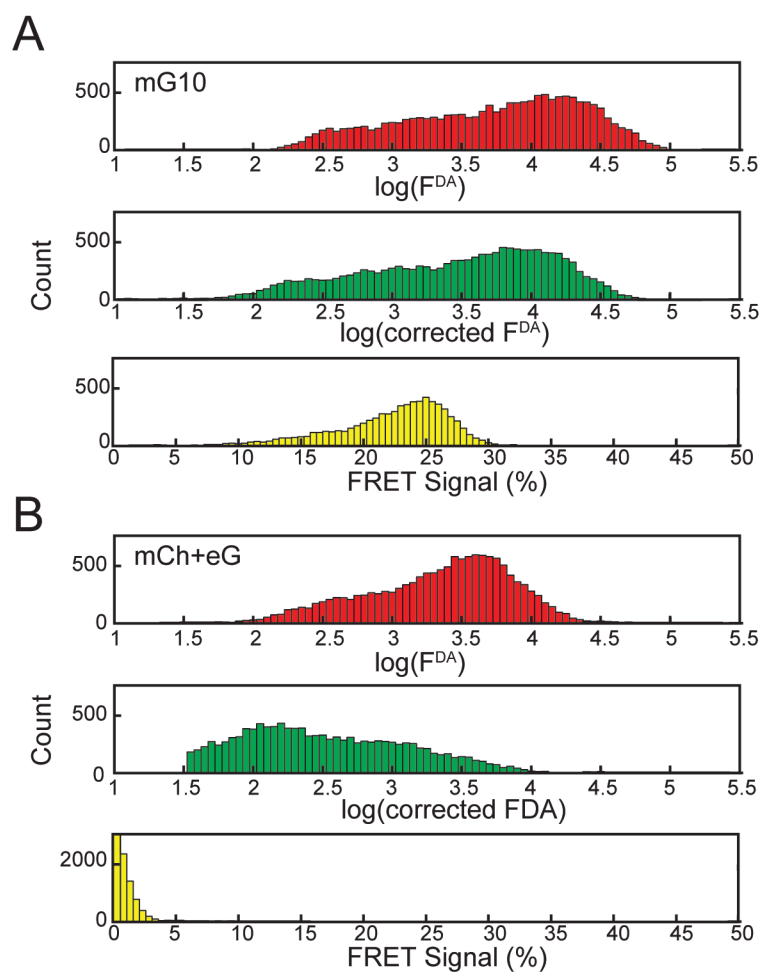

**Figure S5. Calculation of  $N_{FRET}$  from flow cytometry intensities.**

Histograms of fluorescence intensities from HEK293T cells expressing mG10 (A) or mCherry and eGFP (B) in the FRET channel ( $F^{DA}$ , upper panels), corrected for crosstalk (corrected  $F^{DA}$ , middle panels) and converted to  $N_{FRET}$  by normalization with donor and acceptor fluorescence (FRET Signal (%), lower panels).

Zhuo and Knox, 2021

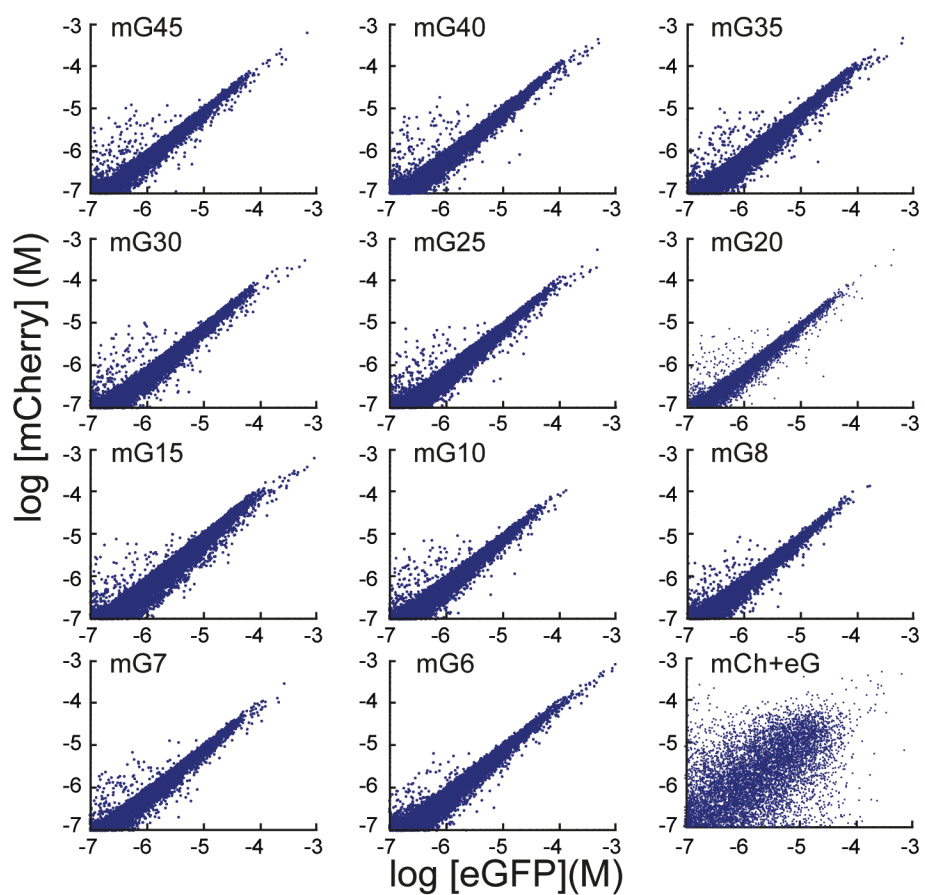

**Figure S6. Multichannel flow cytometry of HEK293T cells expressing mCherry-eGFP fusion proteins separated by linkers of different lengths.**

Histograms of multichannel fluorescence intensities converted to concentration from HEK293T cells expressing mG proteins.

### Crx and Nrl Interactions Using FRET

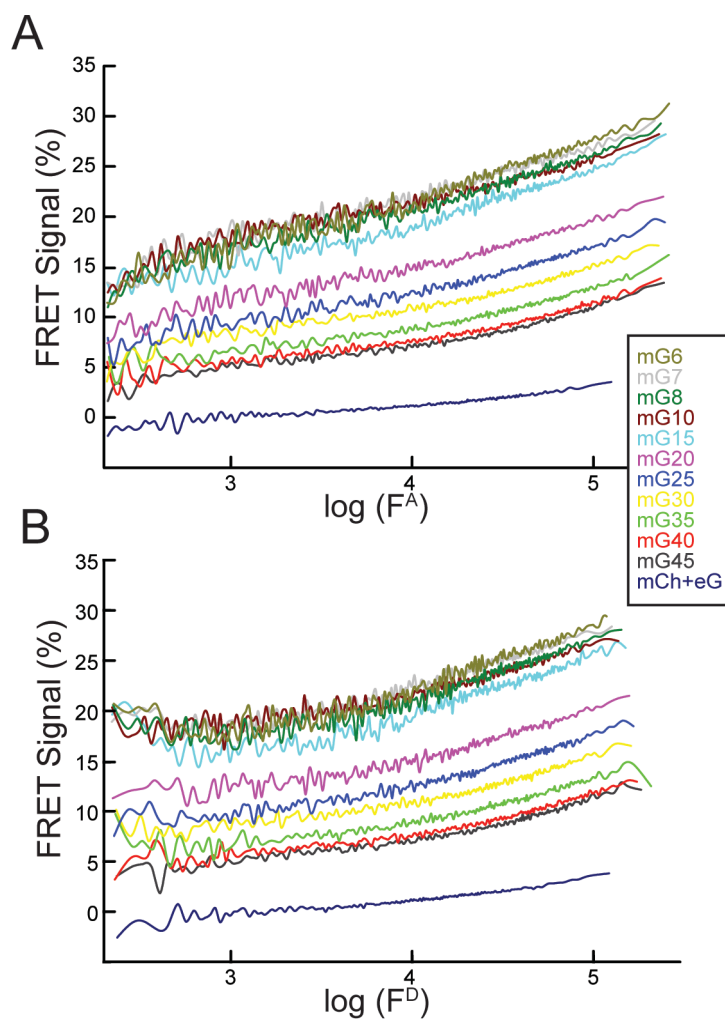

**Figure S7. FC-FRET signal dependence on donor and acceptor fluorescence intensities.**

FRET signals from HEK293T cells expressing mG fusion proteins are plotted as a function of acceptor (A) and donor (B) fluorescence intensity. Intensity range was divided into bins of 100 cells and the mean  $N_{FRET}$  is plotted as a moving average.



Zhuo and Knox, 2021

**Figure S8. Stochastic FRET between mCherry and eGFP.**

A. Calculation of the FRET efficiency as a function of acceptor concentration (assuming a 1:1 donor-acceptor ratio) arising from molecular collisions of freely diffusing eGFP and mCherry using the Lakowicz equation (see Methods). The various values of  $R_0$  are indicated. B. Simulation including protein exclusion size. An example distribution of donor and acceptor molecules (100) randomly arranged in a sphere with a diameter of 100 nm. The distribution was generated including an exclusion zone for each fluorophore to simulate the volume of the protein core. Those pairs that met the distance criterion between the two fluorophores are connected (*lines*). C) For Monte Carlo simulation of stochastic FRET, random distributions as in (B) with different concentrations of donor-acceptor pairs were generated, the ensemble FRET efficiency calculated and then averaged to generate the relative FRET efficiency. The actual measured  $N_{\text{FRET}}$  from an FC-FRET experiment is shown (*dotted line*).

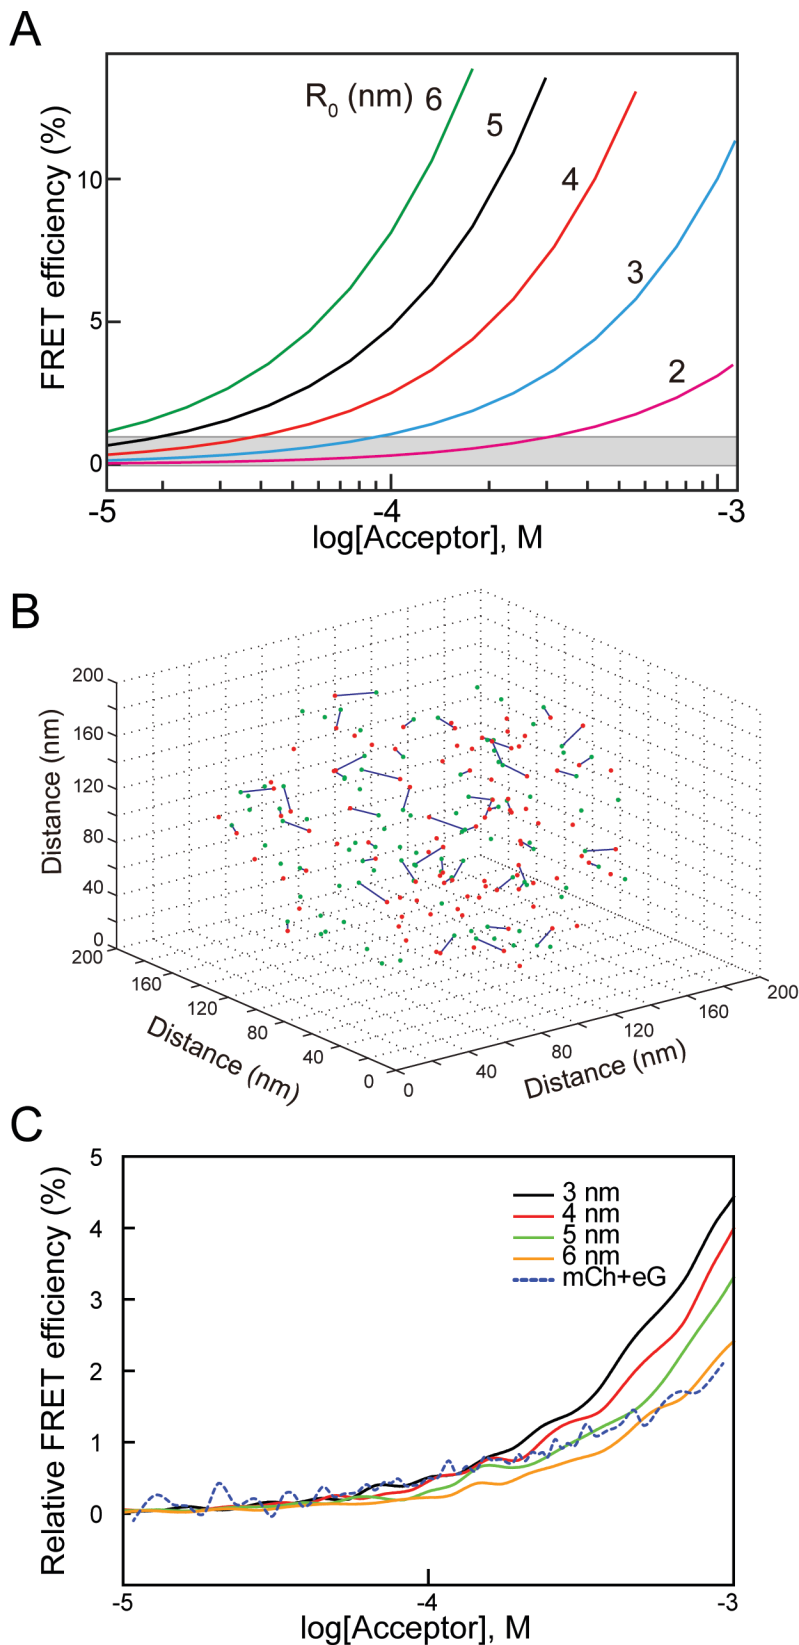

### Crx and Nrl Interactions Using FRET

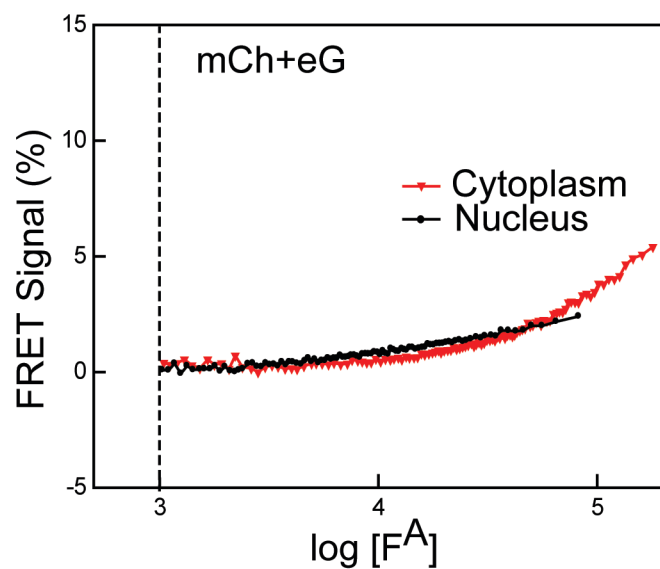

**Figure S9. Comparison of FC-FRET signals from mCherry and eGFP co-expressed in HEK293T cells.**

HEK293T cells were co-transfected with GFP and mCherry with (*black*) and without the nuclear localization signal (*red*).  $N_{\text{FRET}}$  was determined for each cell, the cells were sorted by acceptor intensity and divided into bins of 100 cells. The symbols are the mean for each bin and the line a moving average.

Zhuo and Knox, 2021

**Supplemental Table 1**  
**Linkers for the mCherry-eGFP fusion proteins**

| Name | Length | Amino Acid Sequence                              |
|------|--------|--------------------------------------------------|
|      | aa     |                                                  |
| mG6  | 6      | NH <sub>2</sub> -DPPVAT                          |
| mG7  | 7      | NH <sub>2</sub> -DPVPVAT                         |
| mG8  | 8      | NH <sub>2</sub> -DPAVPVAT                        |
| mG10 | 10     | NH <sub>2</sub> -GGGLDPPVAT                      |
| mG15 | 15     | NH <sub>2</sub> -GGGLDPPVATGGGGG                 |
| mG20 | 20     | NH <sub>2</sub> -DPGA(EAAAK) <sub>2</sub> AVPVAT |
| mG25 | 25     | NH <sub>2</sub> -DPGA(EAAAK) <sub>3</sub> AVPVAT |
| mG30 | 30     | NH <sub>2</sub> -DPGA(EAAAK) <sub>4</sub> AVPVAT |
| mG35 | 35     | NH <sub>2</sub> -DPGA(EAAAK) <sub>5</sub> AVPVAT |
| mG40 | 40     | NH <sub>2</sub> -DPGA(EAAAK) <sub>6</sub> AVPVAT |
| mG45 | 45     | NH <sub>2</sub> -DPGA(EAAAK) <sub>7</sub> AVPVAT |

**Supplemental Table 2**  
**Linker sequences for the Crx and Nrl mCherry/eGFP fusion proteins**

| Construct   | Amino Acid Sequence                                                                                |
|-------------|----------------------------------------------------------------------------------------------------|
| <b>eNrl</b> | NH <sub>2</sub> - <u>MAPKKKRKVNRSKAEQKLISEEDLNSRPLE</u> - <b>eGFP</b> -GGGGGNSSR(L)- <b>Nrl</b>    |
| <b>eCrx</b> | NH <sub>2</sub> - <u>MAPKKKRKVNRSKAEQKLISEEDLNSRPLE</u> - <b>eGFP</b> -GRWRWRPR- <b>Crx</b>        |
| <b>Nrle</b> | NH <sub>2</sub> - <u>MAPKKKRKVNRSKAEQKLISEEDLNSS(R)</u> - <b>Nrl</b> -GGGGG- <b>eGFP</b>           |
| <b>Crxe</b> | NH <sub>2</sub> - <u>MAPKKKRKVNRSKAEQKLISEEDLNSRPLE</u> - <b>Crx</b> -GGGGG- <b>eGFP</b>           |
| <b>mNrl</b> | NH <sub>2</sub> - <u>MAPKKKRKVNRSKAEQKLISEEDLNSGGGG</u> - <b>mCherry</b> -GGGGGNSS(R)- <b>Nrl</b>  |
| <b>mCrx</b> | NH <sub>2</sub> - <u>MAPKKKRKVNRSKAEQKLISEEDLNSRPLEG</u> - <b>mCherry</b> -GGGGGLE- <b>Crx</b>     |
| <b>Nrlm</b> | NH <sub>2</sub> - <u>MAPKKKRKVNRSKAEQKLISEEDLNSS(R)</u> - <b>Nrl</b> -GGGGG- <b>mCherry</b>        |
| <b>Crxm</b> | NH <sub>2</sub> - <u>MAPKKKRKVNRSKAEQKLISEEDLNSRPLE</u> - <b>Crx</b> -GTAGPGSGGGGG- <b>mCherry</b> |

The nuclear localization sequence is underlined. The NCBI accession numbers are for human Crx, NP\_000545 and human Nrl, NP\_001341697. For Nrl constructs, the initiator codon was replaced by the amino acid in parentheses. eGFP and mCherry cDNAs were from Clontech.
